1 Title: **Automatic Detection of Larval Zebrafish ECG: Computational Tool for High-throughput**  
2 **Cardiac Activity Analysis**

3  
4 Short title: **Automatic Detection of Larval Zebrafish ECG**

5  
6  
7 Richard Barrett<sup>1,2</sup>, Rhiannon Hurst<sup>1</sup>, Edward Tarte<sup>2</sup>, Ferenc Müller<sup>3</sup> and Attila Sik<sup>1, 4, 5, 6\*</sup>

8  
9  
10 <sup>1</sup> Institute of Clinical Sciences, College of Medical and Dental Sciences, University of Birmingham,  
11 Birmingham, B15 2TT, UK

12 <sup>2</sup> School of Electronic, Electrical and Systems Engineering, University of Birmingham, Birmingham, B15  
13 2TT, UK

14 <sup>3</sup> Institute of Cancer and Genomic Sciences, College of Medical and Dental Sciences, University of  
15 Birmingham, Birmingham, B15 2TT, UK

16 <sup>4</sup> Institute of Transdisciplinary Discoveries, Medical School, University of Pecs, 7622, Pecs, Hungary

17 <sup>5</sup> Institute of Physiology, Medical School, University of Pecs, 7622, Pecs, Hungary

18 <sup>6</sup> Szentagothai Research Centre, University of Pecs, 7622, Pecs, Hungary

19

20

21 Corresponding author: [sik.attila@pte.hu](mailto:sik.attila@pte.hu)

22

---

23

## Abstract

24 Automatic analysis of larval zebrafish electrocardiographs (ECG) is essential for high-throughput  
25 measurements in environmental toxicity assays, cardiotoxicity measurements and drug screening. We have  
26 developed a MATLAB based software is built on methods that have previously been used to analyze  
27 human ECG, such as the Pan-Tompkins algorithm and Wavelet. For the first time these sophisticated tools  
28 have been applied to larval zebrafish ECG to automatically characterize the heart-beat waveforms. The  
29 ability of the automated algorithm to detect the QT interval for both normal and pharmacologically altered  
30 larval ECG is found and compared to previously used software that is built into LabChart® (AD  
31 Instruments). Using wavelet transforms it is shown that the typical larval ECG features are within the  
32 frequency range of 1 to 31 Hz. It is also shown that the automated software is capable of detecting QTc  
33 (heartrate corrected heartbeat interval) changes within pharmacologically altered zebrafish larval ECG. The  
34 automated process is a significant improvement on the approaches that were previously applied to the  
35 zebrafish ECG. The automated process described here that is based on established techniques of analyzing  
36 ECG can sensitively measure pharmacologically induced changes in the ECG. The novel, automated  
37 software is faster, more sensitive at detecting ECG changes and less dependent on user involvement, thus  
38 minimizing user error and human bias. The automated process can also be applied to human ECG.

39

40

41

## Introduction

42 Using zebrafish larvae for chemical compound screening is becoming increasingly important for  
43 cardiac drug development. It has been previously shown that the zebrafish electrocardiogram (ECG) is  
44 similar to mammals. Another advantage of the zebrafish model is that a minimal amount of chemicals are  
45 necessary for drug testing and embryo production is fast and inexpensive [1]. Furthermore, using mammals  
46 for preliminary screening is expensive, slow and requires enormous numbers of animals. Video-recording

47 of zebrafish embryos' heart activity is currently used for drug screening, but unlike ECG recording it lacks  
48 the temporal and dynamic resolution necessary for cardiac cycle component analysis [2-4]. To aid  
49 development of high-throughput, high fidelity methods to simultaneously and automatically record ECGs  
50 from larval zebrafish, analysis tools that automatically characterize larval ECG signals under control  
51 conditions and after drug treatment are desirable.

52 Presented herein is the first successful attempt to develop analysis tools based on algorithms and  
53 methods that have previously been used to characterize human ECG, including the Pan-Tompkins  
54 algorithm and wavelet transform analysis implemented in MATLAB. These tools are compared to  
55 techniques that have previously been used to analyze zebrafish larval ECG based on the software packages  
56 offered by AD Instruments (LabChart®).

57

## 58 **Methods**

### 59 **Data acquisition**

60 The data used to investigate the analysis tools is larval zebrafish ECG that was taken from 3 days post  
61 fertilization larvae using the methods outlined in [5]. The baseline ECG was recorded for approximately 2  
62 minutes before verapamil was added and the ECG was recorded for a further 25 minutes. This data  
63 represents the typical ECG of a zebrafish larvae recorded in our lab and a typical drug response as  
64 previously demonstrated in our previous paper [5].

### 65 **Data Extraction**

66 After the recording, the data was split into 8, 1-minute sections, labelled chronologically as A, B, C, D, E,  
67 F, G, H and exported from LabChart® as a MATLAB compatible data format. Section A was taken from  
68 ECG recorded before the drug was introduced to the solution whereas sections B-H were recorded  
69 afterwards. Each section was analyzed separately using the different tools outlined above to determine  
70 parameters such as the heart rate and the QTc.

## 71 **Down-sampling the Data for MATLAB Programs**

72 All of the programs written for MATLAB use some initial down-sampling to speed up the processing of the  
73 algorithms. Assuming that all the relevant information in the zebrafish ECG occurs well below 100 Hz the  
74 program down samples to a sampling rate of  $f_s=200$  Hz. In the MATLAB code this appears as:

```
75  
76 %MATLAB ALGORITHM TO DOWNSAMPLE ECG  
77 %% Down-sample to 200 Hz sampling rate  
78 out = ~rem(FS,200)*FS/200 ;
```

79

80

## 81 **Determining the frequency of the components of the zebrafish ECG**

82 To investigate which filtering bandwidth would best capture the ECG features whilst removing any low-  
83 frequency drift and high-frequency interference, the sections were first analyzed using a wavelet transform  
84 in MATLAB. To perform the transform, 20 seconds of raw ECG data was taken from section A and  
85 transformed using a Gaussian wavelet combined with an in built MATLAB function, as described in above.  
86 The result of the wavelet transform was outputted as a contour map and an approximate of the  
87 characteristic frequencies of the ECG features were measured visually. Due to space-time localization it is  
88 not possible to state categorically that the characteristic frequency of each feature was perfectly aligned to  
89 the correct time signature, however the graphical output could be used as a guide of the approximate  
90 frequency of each feature. This frequency of each R wave and T wave within the section was recorded and  
91 tabulated. Graphical outputs of the ECG wavelet transform. From the tabulated data the mean and standard  
92 deviation of the characteristic frequency of the R and T waves were determined. These values were used to  
93 tailor the upper frequency cut-off to remove higher frequency noise without attenuating the ECG signal.  
94 The upper frequency limit was set to the mean R-wave characteristic frequency plus two standard

95 deviations. Assuming that the R-wave frequency is normally distributed about the mean, this would suggest  
96 that approximately 95% of the R-waves would be captured without attenuation. The lower frequency cut-  
97 off was set to 1 Hz for reasons that are outlined above.

98

### 99 **LabChart® Analysis of Sections**

100 To analyze the data through the inbuilt ECG analysis in LabChart®, each section was first band-pass  
101 filtered using the upper and lower cut-offs. The filtered ECG was then analyzed using the protocol outlined  
102 and Fig 1.

103

104 ***Fig 1. Zebrafish larval heartbeats and strategies of the analytical methods. A) Two consecutive larval***  
105 ***heart beats that have been annotated to show the position of the Q, R, S and T-waves. B) The two strategies***  
106 ***employed to analyse the ECG of Larvae. Left: The standard analysis protocol that is part of the inbuilt***  
107 ***LabChart® analysis software. Right: The automated analysis protocol that has been implemented in***  
108 ***MATLAB***

109

110 The LabChart® software automatically locates the position of each R-wave based on user inputs such as,  
111 typical QRS-width, typical RR-interval and QT-interval. Thus the analysis requires some user involvement  
112 from the start. After the location has of each heartbeat has been found it is then decided by the user which  
113 heartbeats should be deemed ‘acceptable’. This is included in the software so that anomalous or corrupted  
114 recording can be omitted from the overall average. In the larval ECG that was studied there were no  
115 anomalous beats and so each beat was accepted. This information is then used by the software to produce  
116 and average waveform that is produced by finding the mean voltage of the heartbeat at each time point,  
117 relative the position of the R-wave.

118 From this average view, the user defines the position of the Q-start point, Q-end point, T-peak and T-end.  
119 From this input the software automatically calculates the QTc (based on the Bazett formula) and other  
120 heartbeat characteristic. This information was exported as a table into Microsoft Excel for further analysis.  
121 Performing the analysis on a section of data takes at least 5 minutes.  
122 This process was performed on each section of larval ECG to determine the heartbeat characteristics before  
123 and after the introduction of the pharmacological agent.

124

### 125 *Applying the Automated process*

126 The automated process was applied to each data section and the outputted QTc was then exported to Excel.  
127 The program measured the QTc for each 40 consecutive heartbeats and the output was tabulated as shown  
128 in Table I.

129

|                                        | <b>A</b> | <b>B</b> | <b>C</b> | <b>D</b> | <b>E</b> | <b>F</b> | <b>G</b> | <b>H</b> |
|----------------------------------------|----------|----------|----------|----------|----------|----------|----------|----------|
| <b>QTc 1<sup>st</sup> 40 beats (s)</b> | 0.533    | 0.525    | 0.537    | 0.531    | 0.544    | 0.568    | 0.576    | 0.563    |
| <b>QTc 2<sup>nd</sup> 40 beats (s)</b> | 0.548    | 0.523    | 0.530    | 0.528    | 0.522    | 0.575    | 0.586    | 0.564    |
| <b>QTc 3<sup>rd</sup> 40 beats (s)</b> | 0.540    | 0.522    | NA       | NA       | NA       | NA       | NA       | NA       |
| <b>Average QTc (s)</b>                 | 0.540    | 0.523    | 0.533    | 0.529    | 0.548    | 0.572    | 0.581    | 0.564    |
| <b>Standard deviation (s)</b>          | 0.006    | 0.001    | 0.003    | 0.002    | 0.004    | 0.004    | 0.005    | 0.001    |
| <b># detected beats</b>                | 127      | 125      | 120      | 117      | 104      | 92       | 88       | 86       |
| <b>RR interval (s)</b>                 | 0.472    | 0.480    | 0.500    | 0.513    | 0.577    | 0.652    | 0.682    | 0.698    |
| <b>QTc change (%)</b>                  | 0.0      | -3.1     | -1.2     | -2.0     | 1.5      | 5.9      | 7.6      | 4.4      |

130

131 *Table 1* The outputted data from automated process that has been collated

132

133 The program also generated a plot of the average waveform found for each set of 40 beats, and searched for  
134 Q-start, Q-end, T-peak and T-end. These intervals were fed into the Bazett formula to calculate the QTc for  
135 each set of beats. An overall QTc for each section of data was found by taking the mean of the measured  
136 QTc for each set of beats. The time taken to analyze each section was approximately 10 seconds.

137

138

## Results

### 139 Larval ECG

140 We have previously reported larval ECG capture for characterization of arrhythmia induced by  
141 pharmacological agents in zebrafish [5]. By acquiring ECG from these model organisms we are able to  
142 evaluate the cardiac effects of drug exposure, temperature changes, anesthetic exposure and staging. A  
143 typical larval ECG signal is shown in Fig 1A, above. Furthermore, the ECG offers a high fidelity output of  
144 the atrial-ventricular rhythmicity that is responsible for many arrhythmias in humans [6]. We have  
145 previously shown that this relationship can be altered in the zebrafish to mimic QTc prolongation in  
146 humans by adding cardio-active drugs such as verapamil [5]. However, to analyze the zebrafish ECG we  
147 have previously relied on software within the LabChart® suite of programs for collecting  
148 electrophysiological data. Although the program is powerful, data analysis is a slow process and requires  
149 significant user involvement that potential introduces human error.

150

151 **LabChart® Analysis Software.** LabChart® is a software package offered by AD Instruments to store and  
152 analyze electrophysiological measurements that are recorded using PowerLab hardware. The program has a  
153 number of inbuilt packages for analyzing ECG data and has previously been used to record and analyze  
154 larval zebrafish ECG. LabChart® is used in this work to compare the analysis outputs versus the alternative  
155 tools under investigation. The LabChart® ECG analysis package is heavily user-dependent as shown in  
156 Fig. 1B. The user must first select a period of ECG that they wish to analyze, specify the RR interval of the

157 data and other characteristics. With this information the software is then able to determine the position of  
158 every R-wave within the ECG and attribute a fiducial mark to this time point. The user is then able to select  
159 or deselect detected “heart beats” based on their “Isoelectric Noise”, “Form Factor” or “RR-interval”, by  
160 setting an acceptable range and domain. Based on the user selections the software then averages all of the  
161 accepted heartbeats to produce an average waveform that represents the overall ECG activity for the  
162 selected time-period. From this averaged waveform the user determines the position of the P, Q and T  
163 features and the software is then able automatically calculate QTc (heartbeat interval corrected for  
164 heartrate) and other parameters of the ECG. By performing this process for larval zebrafish ECG before  
165 and after drug treatments, it is possible to evaluate any pharmacologically induced alterations in the heart  
166 beat cycle. However, this process is time consuming (approximately 3 minutes for 1 data section) and is  
167 heavily dependent on the users’ interpretation of the ECG signal.

168

## 169 **The Automated Analysis Software**

170

### 171 ***Pan-Tompkins Algorithm for QRS Detection***

172 To build automated signal processing software it is necessary to detect the QRS events of the larval ECG  
173 first. Most automated ECG programs attempt to detect the QRS first as it is a dominant feature that is the  
174 most robust to change in the cardiac cycle [7]. For this process a program has been developed based on the  
175 QRS detection algorithms established by Pan and Tompkins in the 1980’s which have been shown to be  
176 robust for many different types of ECG signals [8].

177 The original architecture of the Pan-Tompkins algorithm is divided into three processes which can be  
178 thought of as the Initial Learning Phase (ILP), Secondary Learning Phase (SLP), and Detection Phase (DP).

179 The ILP initializes detection thresholds based upon the size of the “signal” and “noise” peaks detected. The  
180 SLP uses two full heart cycles to determine the average RR interval and then set the limit of the possible



181 RR-interval for the rest of the ECG trace. To allow for any adaptation of the recorded ECG signal, for  
182 example due to pharmacologically induced change in heart rate, these thresholds are adjusted periodically.  
183 The DP processes the ECG and generates a pulse for each QRS. It then uses thresholds based on both the  
184 filtered ECG and the processed signal to detect the QRS waves. Their detection thresholds were set to just  
185 above the “noise” that is sensed by the algorithm. This approach reduced the number of false positives  
186 caused by noise that mimics the QRS characteristics, which is always a problem in human ECG due to  
187 electromyography artefacts. In zebrafish these artefacts could also be a problem due to sporadic motion  
188 artefacts caused by twitching or other motion. The automated process conserves and builds on this  
189 architecture.

190 Pan-Tompkins (P-T) used four simple algorithms to process the ECG data and one further algorithm to  
191 detect the QRS features from the processed data. These stages can be outlined as:

192       1) Filter the signal to remove artefacts, such as electrical noise at 50 Hz or baseline wander (< 1  
193 Hz), and allow the signal to be processed efficiently. In their original work P-T used a transfer function to  
194 implement an Infinite Impulse Response Filter (IIR Filter) to remove the artefacts. Unfortunately, these  
195 types of filters introduce a phase lag that is proportional to the frequency of the input, and so is undesirable  
196 for this work. Instead, for our software inbuilt MATLAB functions are used to filter the signal without a  
197 phase lag. The MATLAB code used to implement the filter is shown below. As seen in the code, a `filtfilt`  
198 function is employed that applies a 3<sup>rd</sup> order Butterworth filter to the raw data to band-pass the signal  
199 between the upper and lower frequency cut offs that are user defined. The filtered data is then normalized.

200

201 %MATLAB ALGORITHM TO FILTER RAW ECG

202 %Filt\_low is user defined cut off to remove low frequency artefacts

203 %Filt\_high is user defined cut off to remove high frequency artefacts

204 %ecg\_raw is a vector that contains the sampled raw ECG recording

```
205 %FS is the sampling frequency
206 % ecg_filt is the filtered ECG signal
207
    Cut_Win=[Filt_low      % cut off window
    Filt_high]*2/FS;      based on sampling
                           frequency
    N = 3;                 % Order of
                           Butterworth Filter
    [a,b] =                % setup of
    butter(N,Cut_Win);     Butterworth filter
    ecg_filt =             % applying the
    filtfilt(a,b,ecg_raw); filter
    ecg_filt = ecg_h/ max( % normalisation of
    abs(ecg_h));           the signal
```

208

209           2) The second stage of the algorithm is to differentiate the signal to accentuate the turning points. If  
210 all artefacts have been removed then the turning points can only be associated with biological events, which  
211 for a normal ECG signal occur at the P-wave, R-wave and T-wave. By differentiating, these features  
212 become amplified. The amount that they are amplified is proportional to their frequency as higher  
213 frequency activity is changing at a faster rate.

Amplification  
due to differentiation  $\propto$  Frequency of  
ECG features

214

215 As R-waves have the highest frequency of the ECG features it is accentuated the most in the differentiated  
216 output (Fig 2A).

217

218 The differentiation is applied via the following iteration,

219

$$\varphi_D[T] = \varphi_F[T + 1] - \varphi_F[T]$$

220 Where  $\varphi_D$  is the differentiated output and  $\varphi_F$  is the filtered ECG signal. In MATLAB this can again be  
221 applied using an inbuilt function for which the code is given below,

222

223 %MATLAB ALGORITHM TO DIFFERENTIATE FILTERED ECG

224 %ecg\_filt is the filtered data from the previous step

225 %ecg\_diff is the differentiated output

226 ecg\_diff=diff(ecg\_filt);

227

228 3) In the thirds stage of the algorithm the differentiated output is squared by applying the iteration,

229

$$\varphi_S[T] = \varphi_D[T] * \varphi_D[T]$$

230 Where  $\varphi_S$  is the squared ECG output. This step further accentuates the turning points in the ECG and  
231 makes the signal positive everywhere, as can be seen in Fig. 2A.

232

233 **Fig 2. Graphical representations of the Pan-Tompkins algorithm applied the Larval ECG. A) The**  
234 **graphical outputs at each stage of the Pan-Tompkins algorithm, annotation are provided to show the**  
235 **position of the R-wave within the signal. B) The result of the Pan-Tompkins algorithm for a 1 minute**  
236 **section of data. Shown on the trace are the adaptive signal threshold and noise level utilized by the**



260

261 `ecg_mwi = conv(ecg_sq ,ones(1 ,round(0.150*FS))/round(0.150*FS));`

262

263 5) After the ECG has been processed in this way it is possible to detect the position of the QRS features via  
264 a peak-hunting algorithm. Pan-Tompkins developed a dual-threshold technique that adapts to the  
265 characteristics of the signal periodically to evaluate the ‘signal’ and ‘noise’ levels in the signal.

266

### 267 *Pan-Tompkins Adaptive Thresholds*

268 The algorithm first searches through the integrated waveform and an R wave is ‘detected’ every time a  
269 peak is found above the established threshold level. If the detected peak is below threshold, it is treated as a  
270 noise peak. If an R wave is not detected within 166% of the previously measured RR interval the program  
271 performs a search back using the second, lower threshold. Every time a peak is detected the algorithm  
272 determines if it is an R-wave using the previously established thresholds and updates the thresholds by the  
273 following algorithm:

274 If the peak that has been found is an R-wave then the new running estimate of the R peak height ( $R_{PK}$ ) is  
275 updated as,

$$276 R_{PK} = 0.125*PEAK + 0.875*R_{PK}$$

277 Where PEAK is the height of the detected peak.

278 If the peak that has been found is below threshold and therefore a noise peak, then the new running  
279 estimate of the noise peak heights ( $N_{PK}$ ) is updated as,

$$280 N_{PK} = 0.125*PEAK + 0.875*N_{PK}$$

281 This enables the new thresholds are updated using;

$$282 THRESHOLD_I = N_{PK} + 0.25* | S_{PK} - N_{PK} |$$

$$283 THRESHOLD_{II} = 0.5*THRESHOLD_I$$

284 If a search back is used to find the peak then the new running estimate of the R-peak height is instead  
285 updated as,

$$286 R_{PK} = 0.25 * PEAK + 0.75 * R_{PK}$$

287 A sequence of values of  $R_{PK}$  and  $N_{PK}$  obtained for sections of data of different lengths are shown in Figs.  
288 2B and 2C.

289 The program then searches through the filtered ECG signal to find QRS complexes using a similar  
290 approach. The program applies thresholds to the filtered ECG in the following way; if the detected peak  
291 (FPEAK) is an R-wave then the running estimate of the signal ( $FR_{PK}$ ) is updated as

$$292 FR_{PK} = 0.125 * FPEAK + 0.875 * FR_{PK}$$

293 If the peak that has been found is a noise peak, then the new noise peak height ( $FN_{PK}$ ) is updated as,

$$294 FN_{PK} = 0.125 * FPEAK + 0.875 * FN_{PK}$$

295 And again the new thresholds are updated as;

$$296 FTHRESHOLD_I = FN_{PK} + 0.25 * | FS_{PK} - FN_{PK} |$$

$$297 FTHRESHOLD_{II} = 0.5 * FTHRESHOLD_I$$

298 If a search back is used to find the peak then the new running estimate R-peak height is instead updated as,

$$299 FR_{PK} = 0.25 * FPEAK + 0.75 * FR_{PK}$$

300 An identified QRS peak is only declared as an R-wave to be carried forward into the further analysis if it is  
301 detected in both passes. Every time a QRS peak is detected there is a 200 ms refractory period in which no  
302 other R-wave can be found.

303

### 304 ***Producing an Average Waveform from the Fiducial Points***

305 Once the Pan-Tompkins algorithm has located the position of each R-wave in a section of ECG they can be  
306 used as fiducial points to produce an average waveform,  $\bar{\varphi}$ . This is found by summing the voltage recorded  
307 at equivalent time points, T within each heartbeat,  $i$  and then dividing by the number of beats in the

308 average. This enables the mean voltage at every position in the heart beat, relative to the R wave to be  
309 determined using the formula below,

310 
$$\bar{\varphi}[T] = \frac{\sum_T \sum_{i=0}^N \varphi_i[T]}{N}$$

311 For the automated process the average waveform is calculated for a period that is equal to the measured RR  
312 interval that runs from 0.15 s before the R peak. This is shown in Fig. 2D.

313

### 314 **Detecting ECG features from the Average Waveform**

315 To detect the features from the average waveform the program looks for peaks and troughs in appropriate  
316 windows within the heartbeat. The windows are shown in Fig. 2D and correspond to:

317 To find Q the software searches for the local minima in the region that is 0.15 s before the R peak. This  
318 window is guaranteed to contain a Q-wave if the R-wave frequency is greater than 6 Hz.

319 To find the T Peak the software searches for the local maxima that has the largest amplitude after the R  
320 peak. Once the T-peak has been found the program searches for the next point at which the ECG changes  
321 sign and designates this as the T end point. This is in accordance with other well established interpretations  
322 of the ECG signal [9].

323

### 324 **Calculating QTc from the Analyzed Waveform**

325 The QT length is dependent on the heart rate of the fish and so it is necessary to calculate the corrected QTc  
326 by feeding in the measured QT and RR interval into the Bazett formula [10], where;

327 
$$QTc = \frac{QT}{\sqrt{RR}}$$

### 328 **Wavelet Transform Analysis**

329 Wavelet transforms allow frequency analysis of a time-dependent signal, which allows the fundamental  
330 range of frequencies in the signal to be determined in order to optimize filter selection. The characteristics





```
freq = scal2frq(1:1028,'mexh',1/fs); %initialise frequency
```

```
parameters for
```

```
Wavelet Transform
```

```
plot
```

```
y=cwt(ecg(200:4200),[1:1028],wlet); %performs wavelet
```

```
transform
```

```
350 figure;
```

```
351 subplot(3,1,1);plot(t/fs,ecg(200:4200)),axis tight, title('Signal'); ylabel('Voltage');
```

```
352 subplot(3,1,2:3);contour(t/fs,freq,abs(y)); axis tight, ylim([Filt_low,Filt_high]), xlabel('Time, s'),
```

```
353 ylabel('Frequency, Hz'),title('Wavelet Spectrogram'); colormap('default');
```

```
354
```

```
355 The frequency characteristics of the ECG
```

356 Contour plots of the Wavelet transform of the 20 second section of ECG and a shorter 1s section are shown  
357 in Fig. 3, together with the ECG trace on which the transform was performed. As can be seen in Fig. 3A, 42  
358 heart beats were recorded in the section and from these beats the R-wave and T-wave frequency could be  
359 determined.

```
360
```

361 ***Fig. 3 Contour plots to show the wavelet transforms of the ECG together with the Raw ECG trace. A) 20***  
362 *seconds of normal zebrafish ECG, and its corresponding wavelet transform. B) 5 seconds of zebrafish*  
363 *ECG, and its corresponding wavelet transform. Annotations show the position of the R and T-waves and*  
364 *their corresponding frequencies*

```
365
```

366 From the 42 beats the mean characteristic R-wave frequency was found to be,  $\overline{R_f} = 24.1$  Hz, with a  
367 standard deviation of,  $\sigma = 3.4$  Hz. The mean characteristic T-wave frequency was found to be,  $\overline{T_f} = 6.6$  Hz  
368 , with a standard deviation of 1.3 Hz.

369 Assuming that most of the R-waves are adequately captured when the low pass filter is set to 2 standard  
370 deviations above mean frequency, a low pass cut-off of 31Hz was selected for the analysis. It can also be  
371 seen that a high pass filter of 1 Hz would not attenuate the signal. As a result of these observations it was  
372 decided that the data should be band pass filtered between 1 and 31 Hz to aid further analysis.

373

#### 374 *LabChart® Analysis*

375 Fig. 4 shows a typical outcome of the LabChart® analysis on a section of data. Immediately after the drug  
376 is added to the medium the measured QTc decreases which is followed by a steady increase in QTc until  
377 around 15 minutes after the drug has been administered. The maximum QTc change measured over this  
378 time is just under 5%. There is a steady increase in the RR interval from moment that the drug is  
379 administered from a minimum of 0.46 s to a maximum of around 0.7 s.

380

381 ***Fig. 4 The LabChart® analysis process of normal and pharmacologically altered larval ECG. The***  
382 *process consists of A) defining the position of each R-wave in the filtered ECG, B) Selecting which beats*  
383 *are to be 'accepted' to create C) the average ECG waveform. The average waveform generated for normal*  
384 *(before drug) and pharmacologically altered (25 minutes after drug delivery) ECG to highlight the change*  
385 *in the QT interval.*

386

#### 387 *The Automated Software Analysis*

388 Our software was able to automatically detect the ECG peaks accurately, and drug effect on Q-T interval  
389 was determined (Fig. 5).

390

391 **Fig 5. A comparison of the average ECG before and after 1mM of Verapamil had been added to the**  
392 **recording media.** The top waveform produced from ECG 1 minute before the drug had been introduced,  
393 the bottom figure was taken from data 20 minutes after the drug had been introduced.

394

395 The measured QTc and RR interval from the automated analysis have been plotted in Fig. 6.

396

397 **Fig 6. Scatter Graph to show the measured QTc and RR interval for the larvae from the MATLAB**  
398 **Software.**

399

400 In the same way that was demonstrated by the LabChart® analysis software, immediately after the drug is  
401 added to the medium the measured QTc decreases which is followed by an increase in QTc until around 15  
402 minutes after the drug has been administered. However, for this analysis software the maximum QTc  
403 change measured over this time is just under 8%. It can also be seen that again there is a steady increase in  
404 the RR interval from moment that the drug is administered that is almost identical to the LabChart®  
405 analysis software (Fig. 7).

406

407 **Fig 7. Scatter Graph to show the measured QTc and RR interval for the larvae from the LabChart®**  
408 **Software.**

409

410 *Comparison of the LabChart® and MATLAB analysis software*

411 To aid comparison between the two analysis techniques the LabChart® and automated data are plotted  
412 together in Fig. 8. As can be seen in Fig. 8A, the measured QTc initially start off very similar until around 7  
413 minutes after the drug has been added, after which the automated MATLAB software consistently records a

414 higher QTc than the LabChart® program. This phenomena occurs despite the programs measuring a very  
415 similar RR interval and detected number of beats for each section. The difference between the two analysis  
416 techniques is further illustrated in Fig. 8D, which shows the measured QTc change for both. Although the  
417 patterns are broadly similar, the automated process consistently records larger QTc change than the  
418 LabChart® program.

419

420 **Fig 8. Plots to compare the measured ECG characteristics from LabChart® and MATLAB software. A)**  
421 *Comparison of measure QTc B) Comparison of Measured RR interval C) Comparison of number of*  
422 *detected beats, D) comparison of measured QTc change for both programs.*

423

424

425

## Discussion

426 The automated process is a significant improvement on the approaches that were previously applied to the  
427 zebrafish ECG. This article shows that the automated process that is based on established techniques of  
428 analyzing ECG can sensitively measure pharmacologically induced changes in the ECG.

429 However, it has also been shown that there are differences between the results obtained through the  
430 analysis with the LabChart® software and the automated process. The main difference is that the automated  
431 process consistently measures a larger QTc change that the previously used approach. This can be  
432 explained by the fact the LabChart® program analyses the whole section in one go, compared to the  
433 automated the process that outputs the QTc value for each 40 beats. Assuming that the QTc is not constant  
434 within each section of the ECG recording, the LabChart® software will be less sensitive to subtle variations  
435 in the ECG as it instead finds a global average across the whole section. Even if QTc at the start and the  
436 end of the section are systematically different, the overall result will be somewhere in the middle. Instead,

437 by focusing on smaller numbers of beats within the section the automated process provides a truer  
438 reflection of the actual QTc change within the recording and is more able to pick up these smaller changes.

439 The automated process is faster is able to detect the heart beats robustly and has less human  
440 involvement than the LabChart® software, so it represents a significant improvement in the analysis  
441 available when analysis zebrafish larval ECG. Furthermore, there is no reason why this software cannot be  
442 applied to human ECG in the same way.

443

#### 444 **Acknowledgments**

445

446 This work was supported by the European Union’s Horizon 2020 Marie Skłodowska Curie Research and  
447 Innovation Staff Exchange programme (VISGEN, No. 734862) and OPEN FET RIA (NEURAM, No,  
448 712821), the Higher Education Institutional Excellence Programme of the Ministry for Innovation and  
449 Technology in Hungary, within the framework of the “Innovation for the sustainable life and environment”  
450 thematic programme of the University of Pecs, and the Wellcome Trust Investigator Award  
451 (106955/Z/15/Z) to FM. The funders had no role in study design, data collection and analysis, decision to  
452 publish, or preparation of the manuscript.

453

454

#### 455 **References**

456

- 457 1. Lieschke GJ, Currie PD. Animal models of human disease: zebrafish swim into view. *Nat Rev Genet.*  
458 2007;8(5):353-67. doi: 10.1038/nrg2091. PubMed PMID: 17440532.
- 459 2. Yu F, Zhao Y, Gu J, Quigley KL, Chi NC, Tai YC, et al. Flexible microelectrode arrays to interface  
460 epicardial electrical signals with intracardial calcium transients in zebrafish hearts. *Biomed Microdevices.*

- 461 2012;14(2):357-66. doi: 10.1007/s10544-011-9612-9. PubMed PMID: 22124886; PubMed Central PMCID:  
462 PMC3322508.
- 463 3. Milan DJ, Jones IL, Ellinor PT, MacRae CA. In vivo recording of adult zebrafish electrocardiogram  
464 and assessment of drug-induced QT prolongation. *American journal of physiology*. 2006;291(1):H269-73.  
465 doi: 10.1152/ajpheart.00960.2005. PubMed PMID: 16489111.
- 466 4. De Luca E, Zaccaria GM, Hadhoud M, Rizzo G, Ponzini R, Morbiducci U, et al. ZebraBeat: a flexible  
467 platform for the analysis of the cardiac rate in zebrafish embryos. *Scientific Reports*. 2014;4:1-13.
- 468 5. Dhillon SS, Doro E, Magyary I, Egginton S, Sik A, Muller F. Optimisation of embryonic and larval  
469 ECG measurement in zebrafish for quantifying the effect of QT prolonging drugs. *PLoS One*.  
470 2013;8(4):e60552. doi: 10.1371/journal.pone.0060552. PubMed PMID: 23579446; PubMed Central  
471 PMCID: PMC3620317.
- 472 6. Hoffman BF, Rosen MR, Wit AL. Electrophysiology and pharmacology of cardiac arrhythmias. III.  
473 The causes and treatment of cardiac arrhythmias. Part A. *Am Heart J*. 1975;89(1):115-22. PubMed PMID:  
474 1109541.
- 475 7. Kohler BU, Hennig C, Orglmeister R. The principles of software QRS detection. *IEEE Eng Med Biol*  
476 *Mag*. 2002;21(1):42-57. PubMed PMID: 11935987.
- 477 8. Pan J, Tompkins WJ. A real-time QRS detection algorithm. *IEEE Trans Biomed Eng*.  
478 1985;32(3):230-6. doi: 10.1109/TBME.1985.325532. PubMed PMID: 3997178.
- 479 9. Lepeschkin E, Surawicz B. The measurement of the Q-T interval of the electrocardiogram.  
480 *Circulation*. 1952;6(3):378-88. PubMed PMID: 14954534.
- 481 10. Sagie A, Larson MG, Goldberg RJ, Bengtson JR, Levy D. An improved method for adjusting the QT  
482 interval for heart rate (the Framingham Heart Study). *Am J Cardiol*. 1992;70(7):797-801. PubMed PMID:  
483 1519533.

- 484 11. Li C, Zheng C, Tai C. Detection of ECG characteristic points using wavelet transforms. IEEE Trans  
485 Biomed Eng. 1995;42(1):21-8. PubMed PMID: 7851927.
- 486 12. Addison PS. Wavelet transforms and the ECG: a review. Physiol Meas. 2005;26(5):R155-99. doi:  
487 10.1088/0967-3334/26/5/R01. PubMed PMID: 16088052.
- 488

## Two Consecutive Larval Heartbeats

bioRxiv preprint doi: <https://doi.org/10.1101/2021.02.08.430220>; this version posted February 8, 2021. The copyright holder for this preprint (which was not certified by peer review) is the author/funder, who has granted bioRxiv a license to display the preprint in perpetuity. It is made available under aCC-BY 4.0 International license.

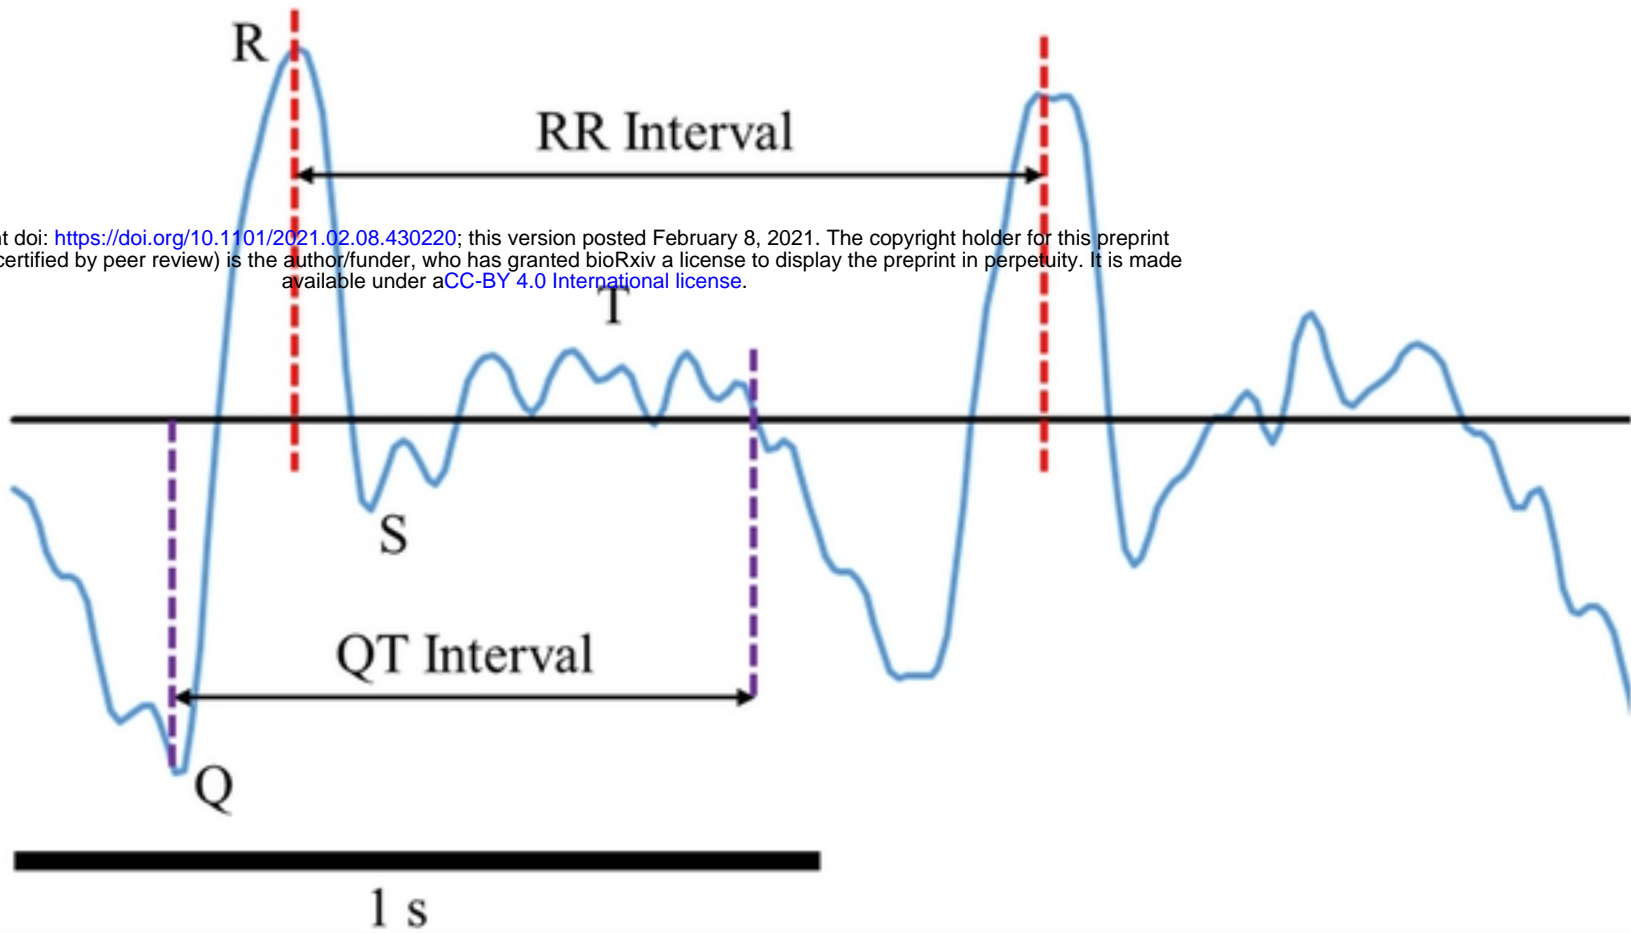

A)

### LabChart ECG Analysis Process

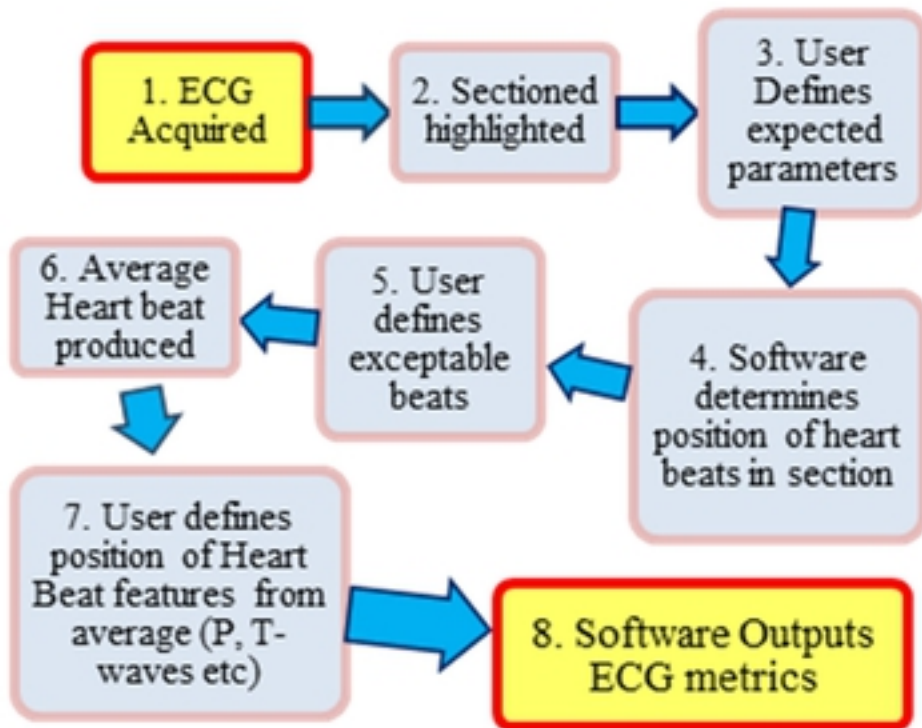

### Preferred ECG Analysis Process

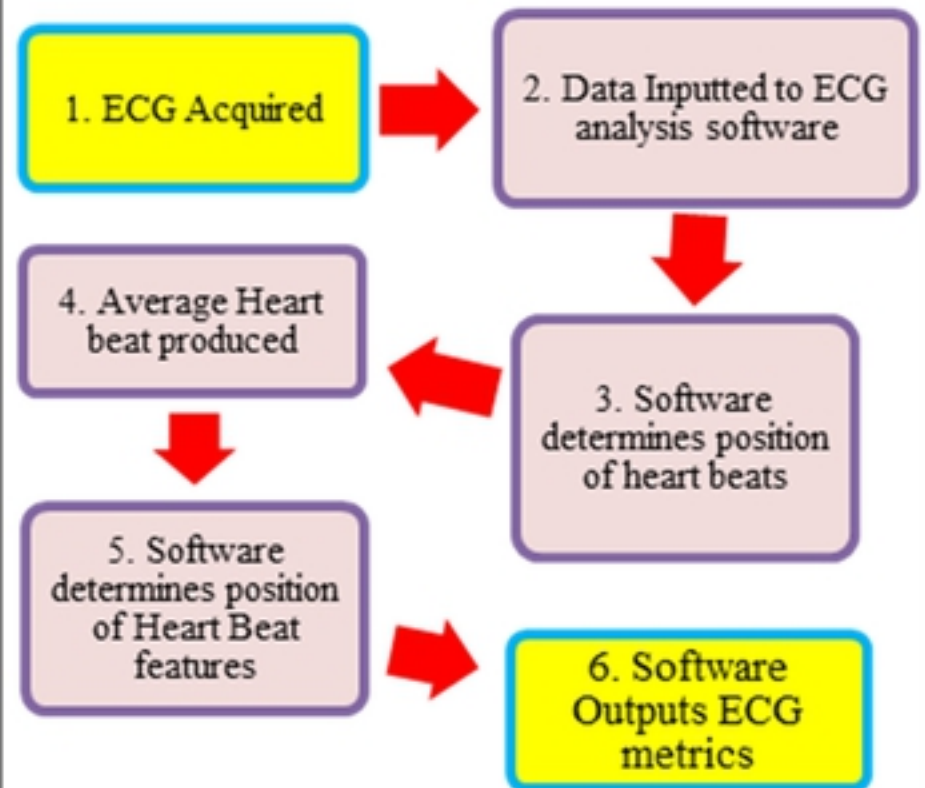

B)

Figure 1



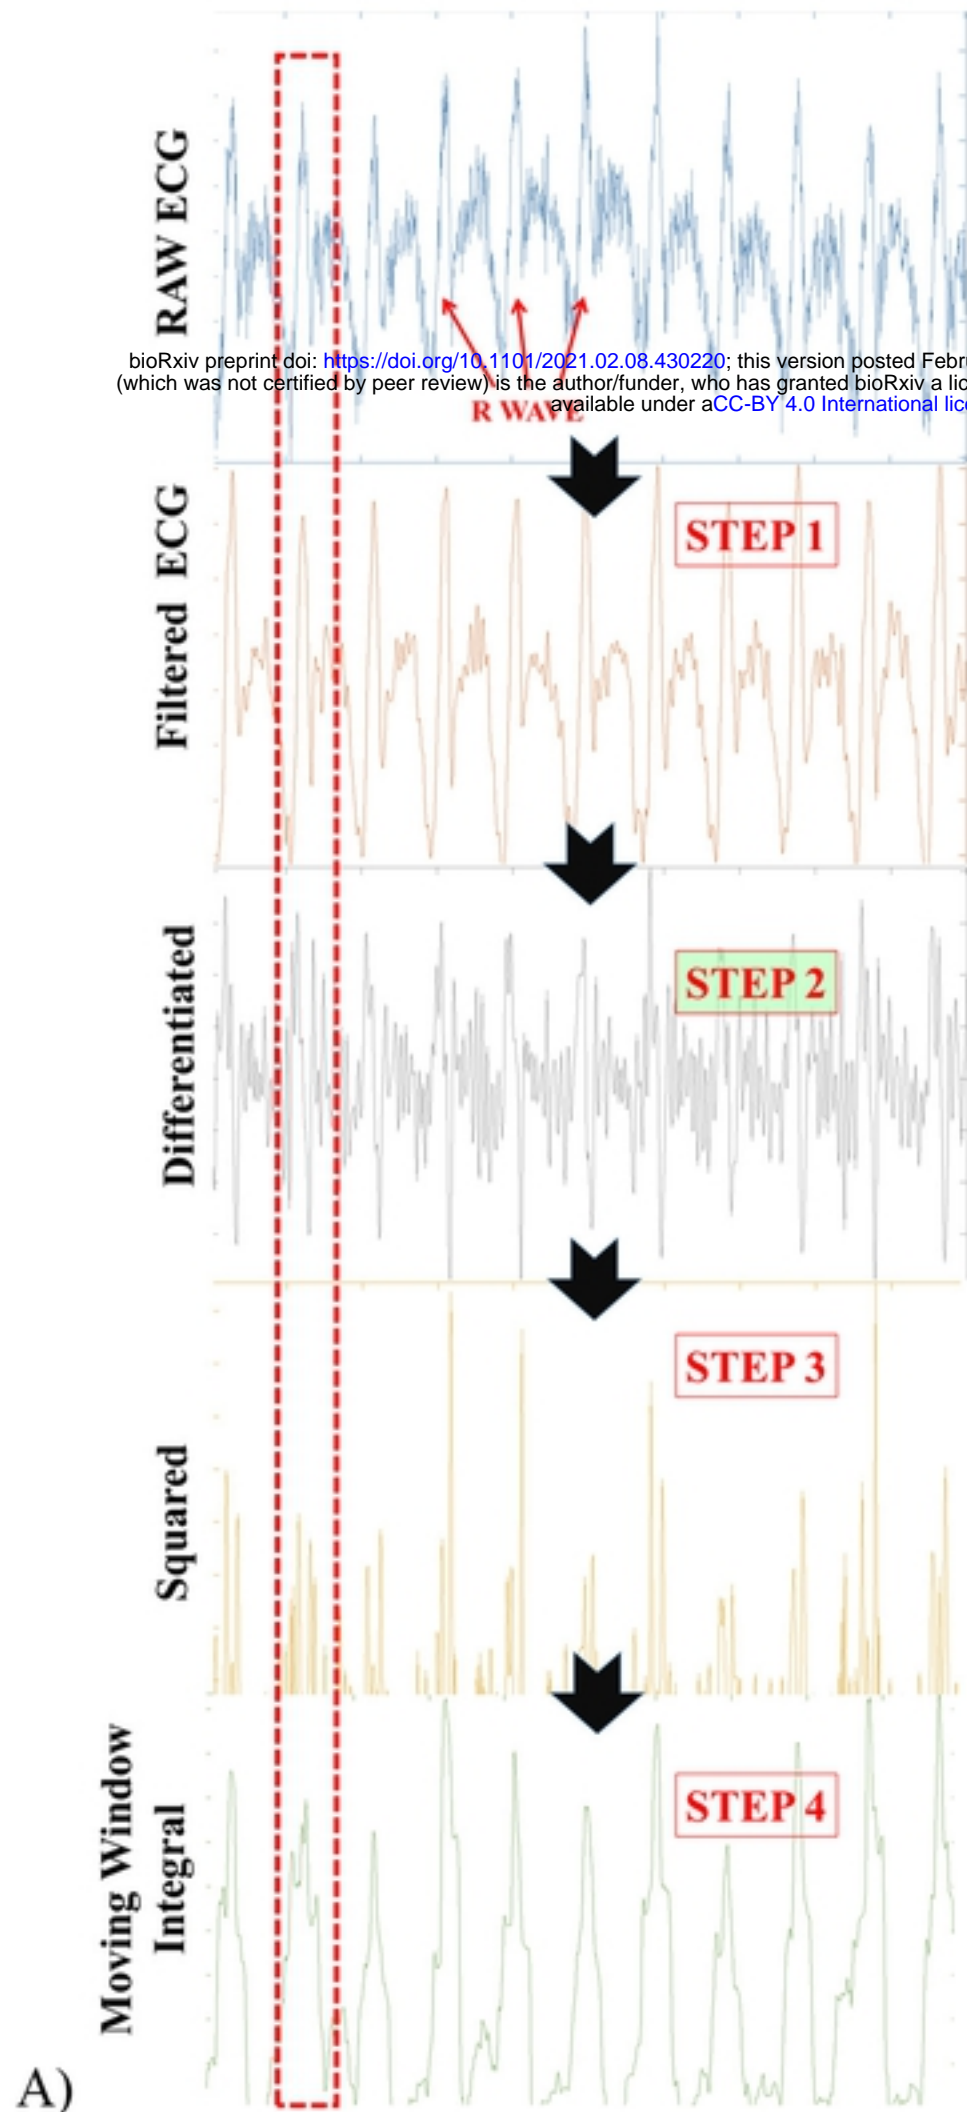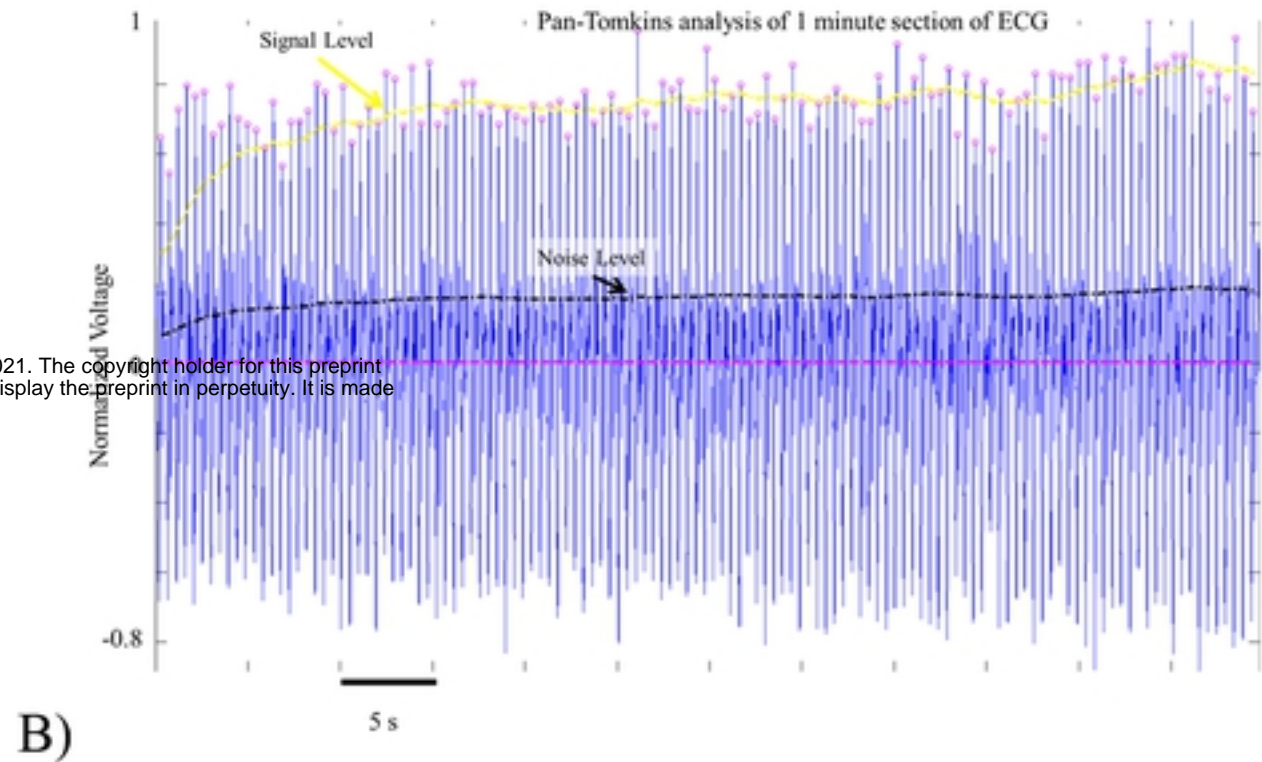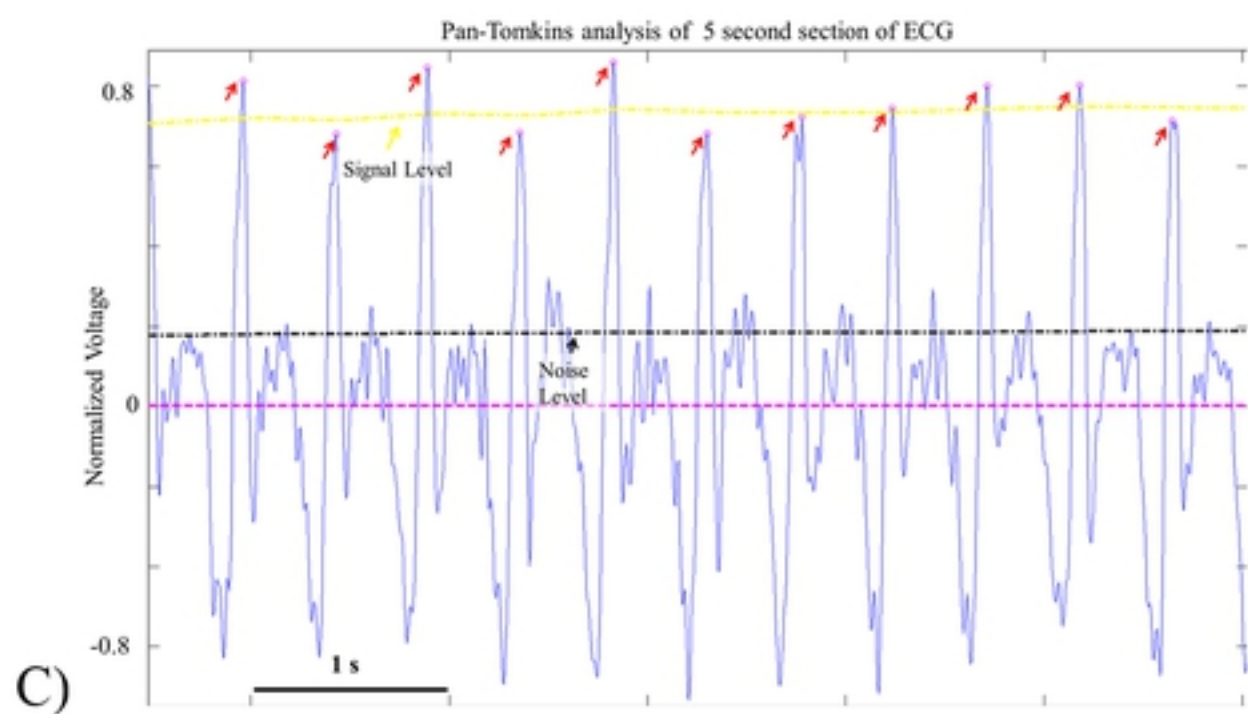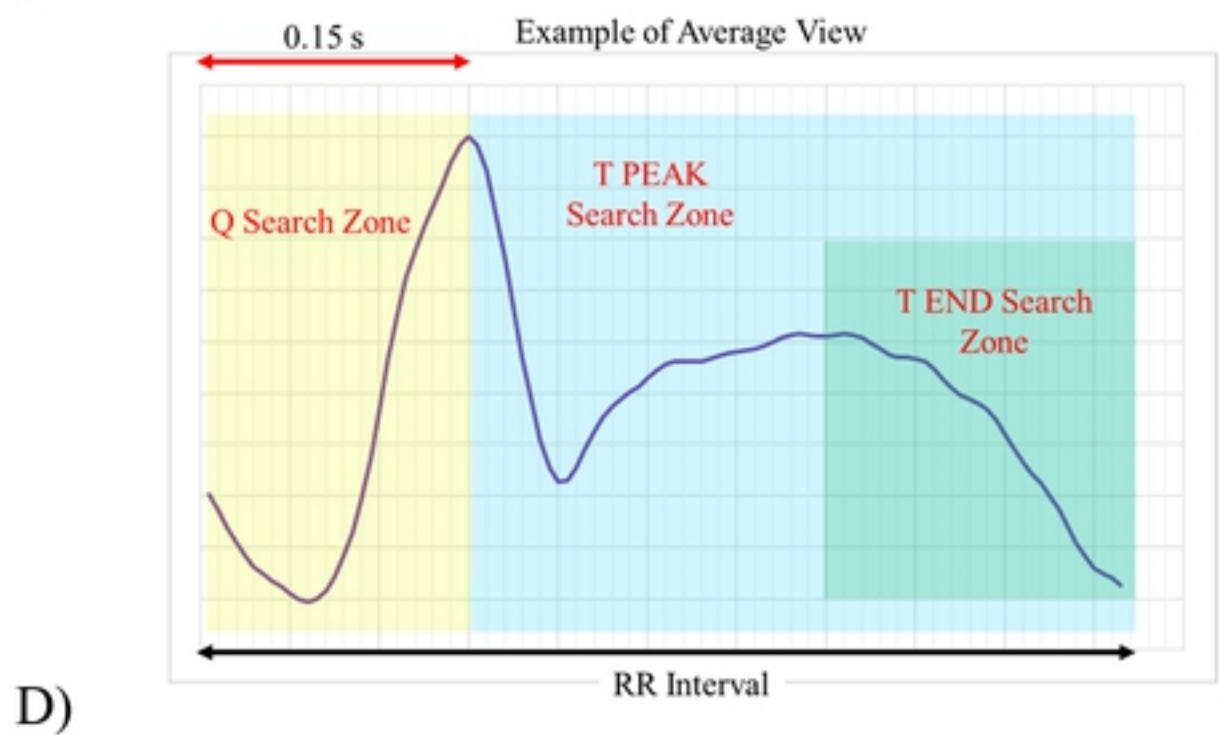

Figure 2

### A twenty second section ECG (Top) and its corresponding Wavelet Transform (Bottom)

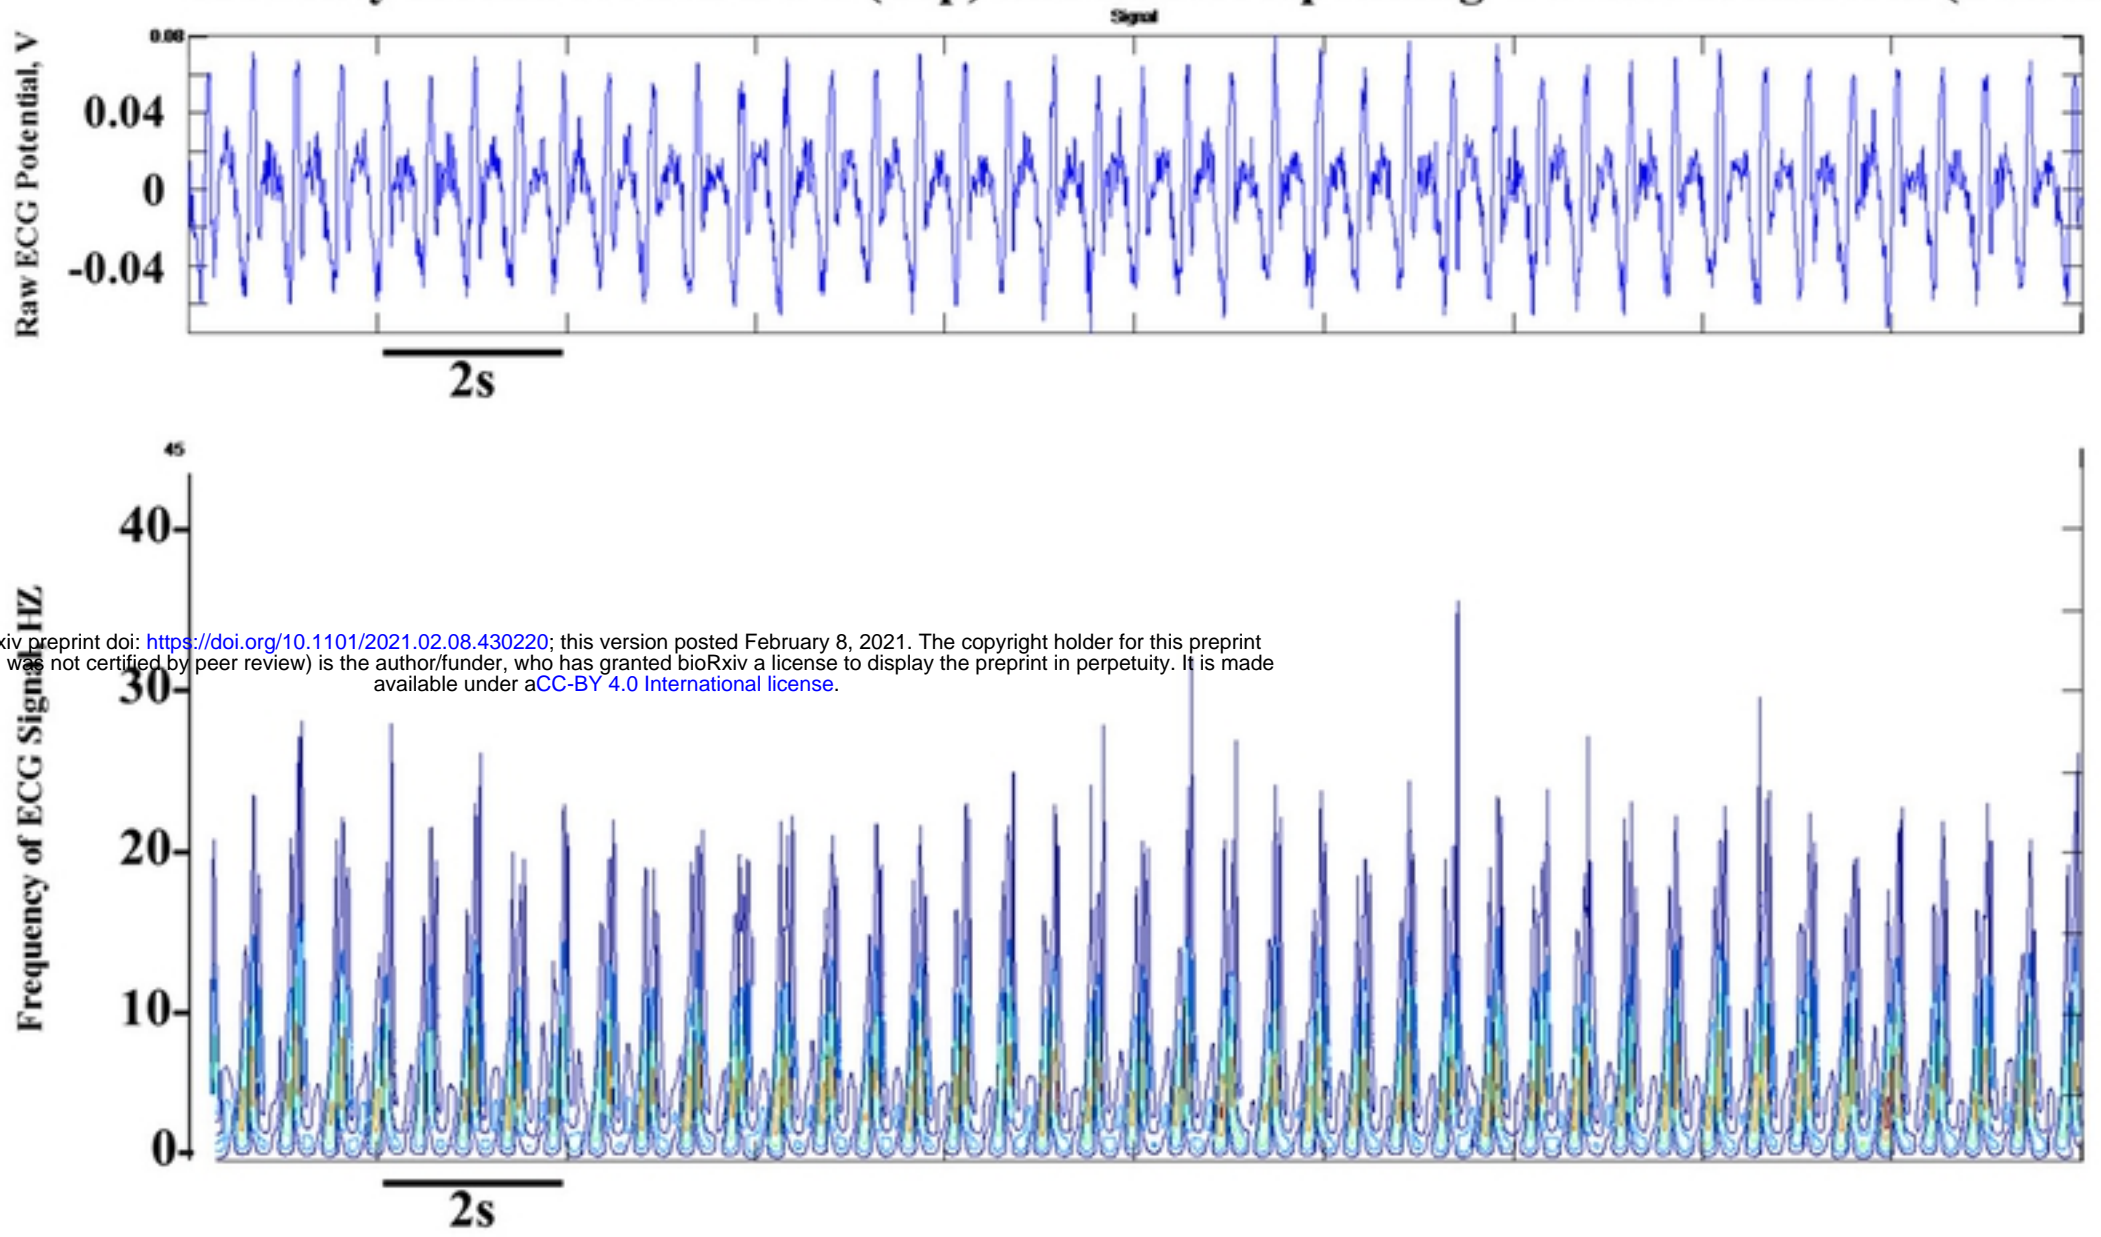

bioRxiv preprint doi: <https://doi.org/10.1101/2021.02.08.430220>; this version posted February 8, 2021. The copyright holder for this preprint (which was not certified by peer review) is the author/funder, who has granted bioRxiv a license to display the preprint in perpetuity. It is made available under aCC-BY 4.0 International license.

A)

### A one second section ECG (Top) and its corresponding Wavelet Transform (Bottom)

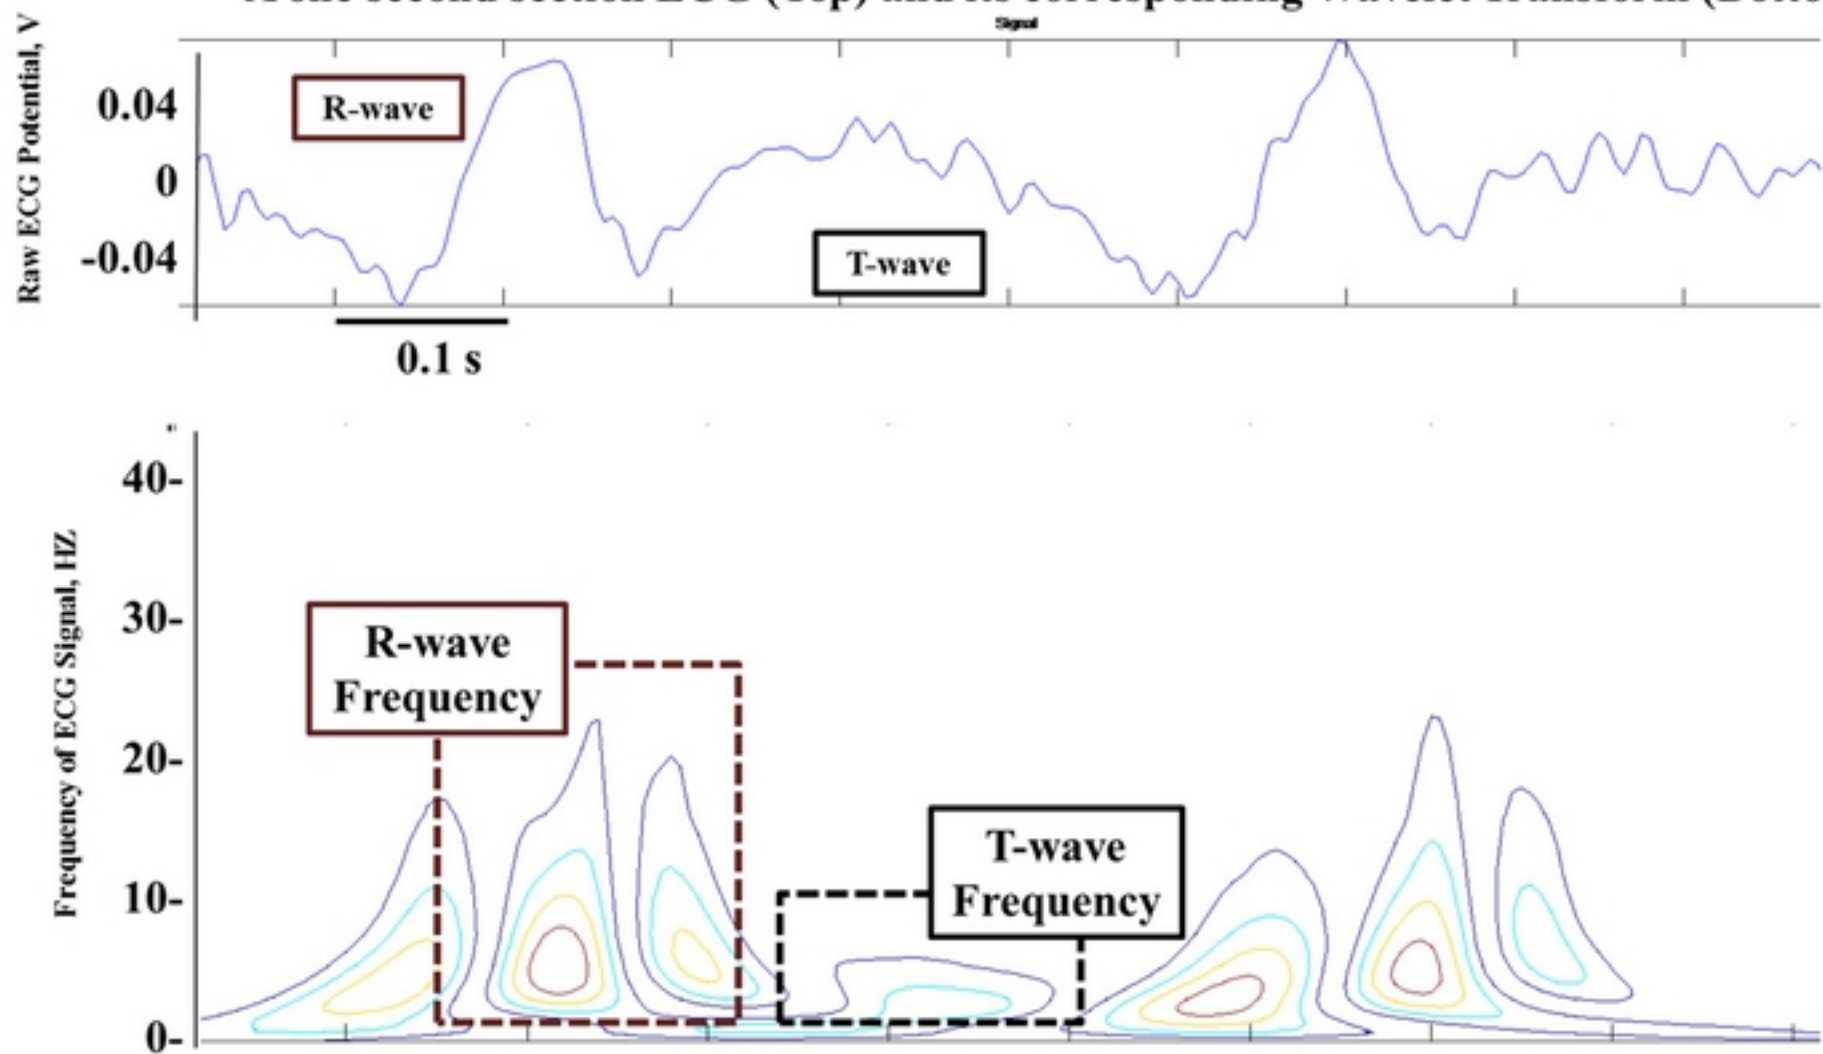

B)

Figure 3



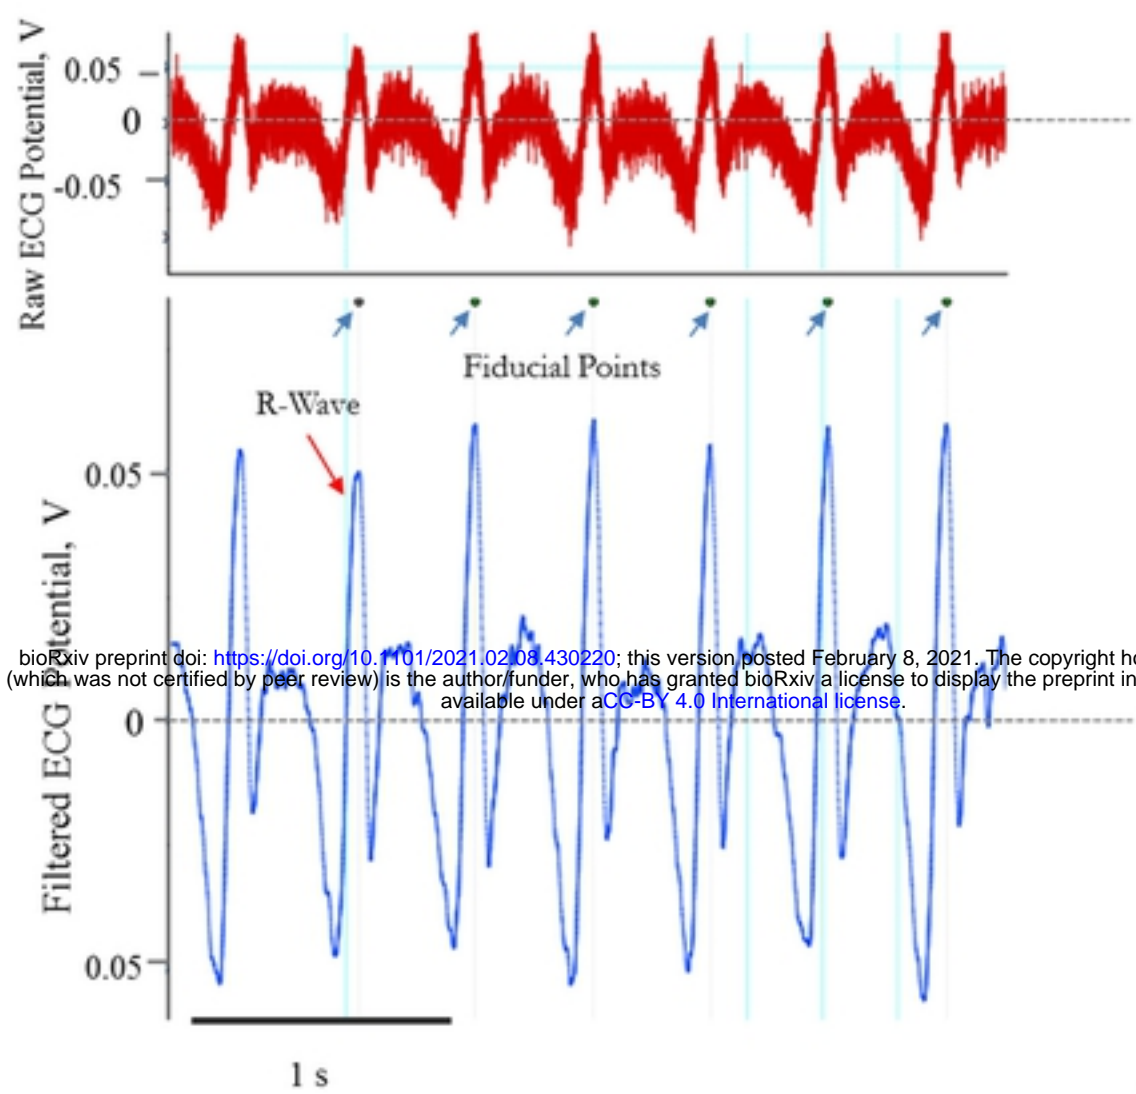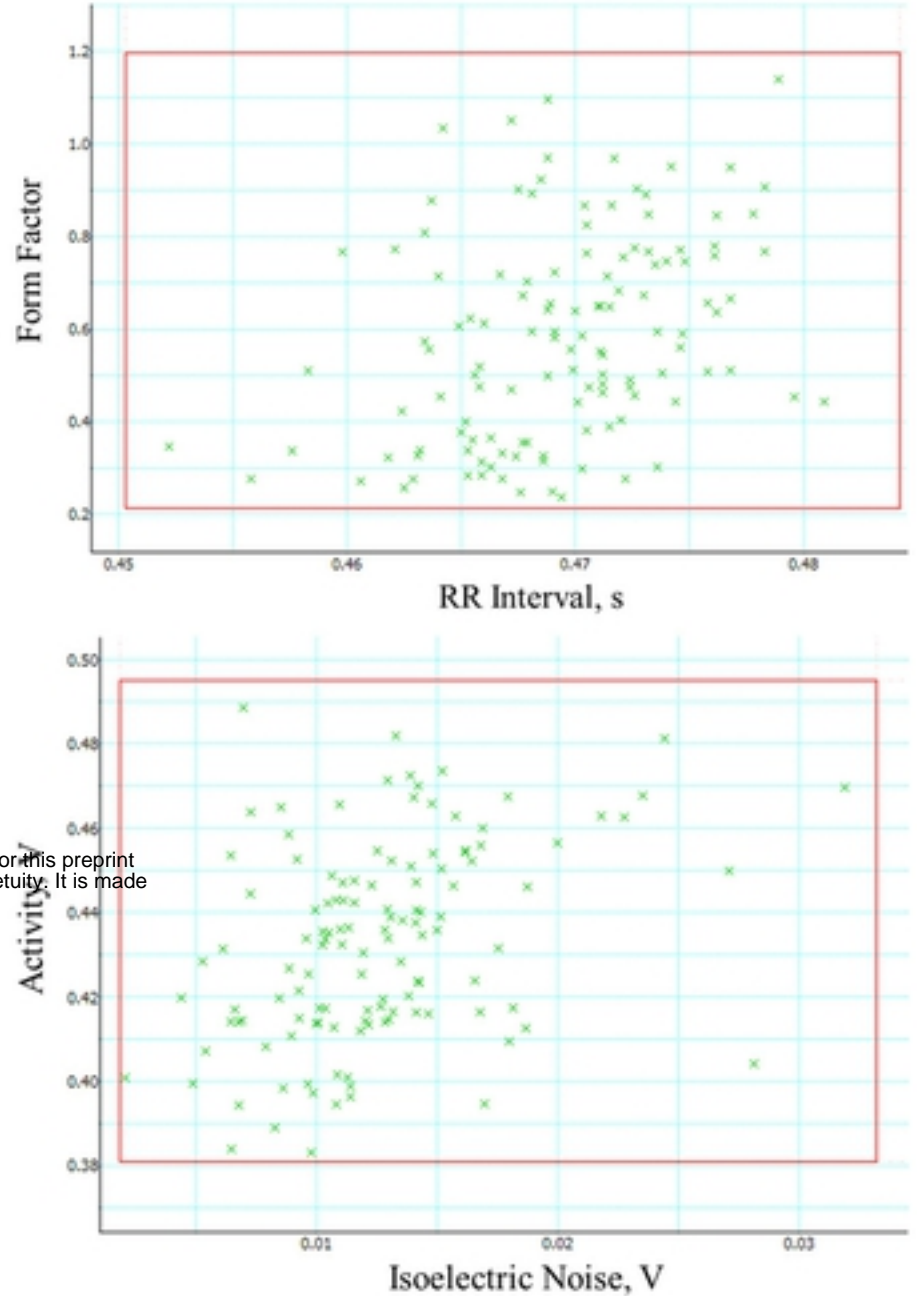

bioRxiv preprint doi: <https://doi.org/10.1101/2021.02.08.430220>; this version posted February 8, 2021. The copyright holder for this preprint (which was not certified by peer review) is the author/funder, who has granted bioRxiv a license to display the preprint in perpetuity. It is made available under aCC-BY 4.0 International license.

A) B)

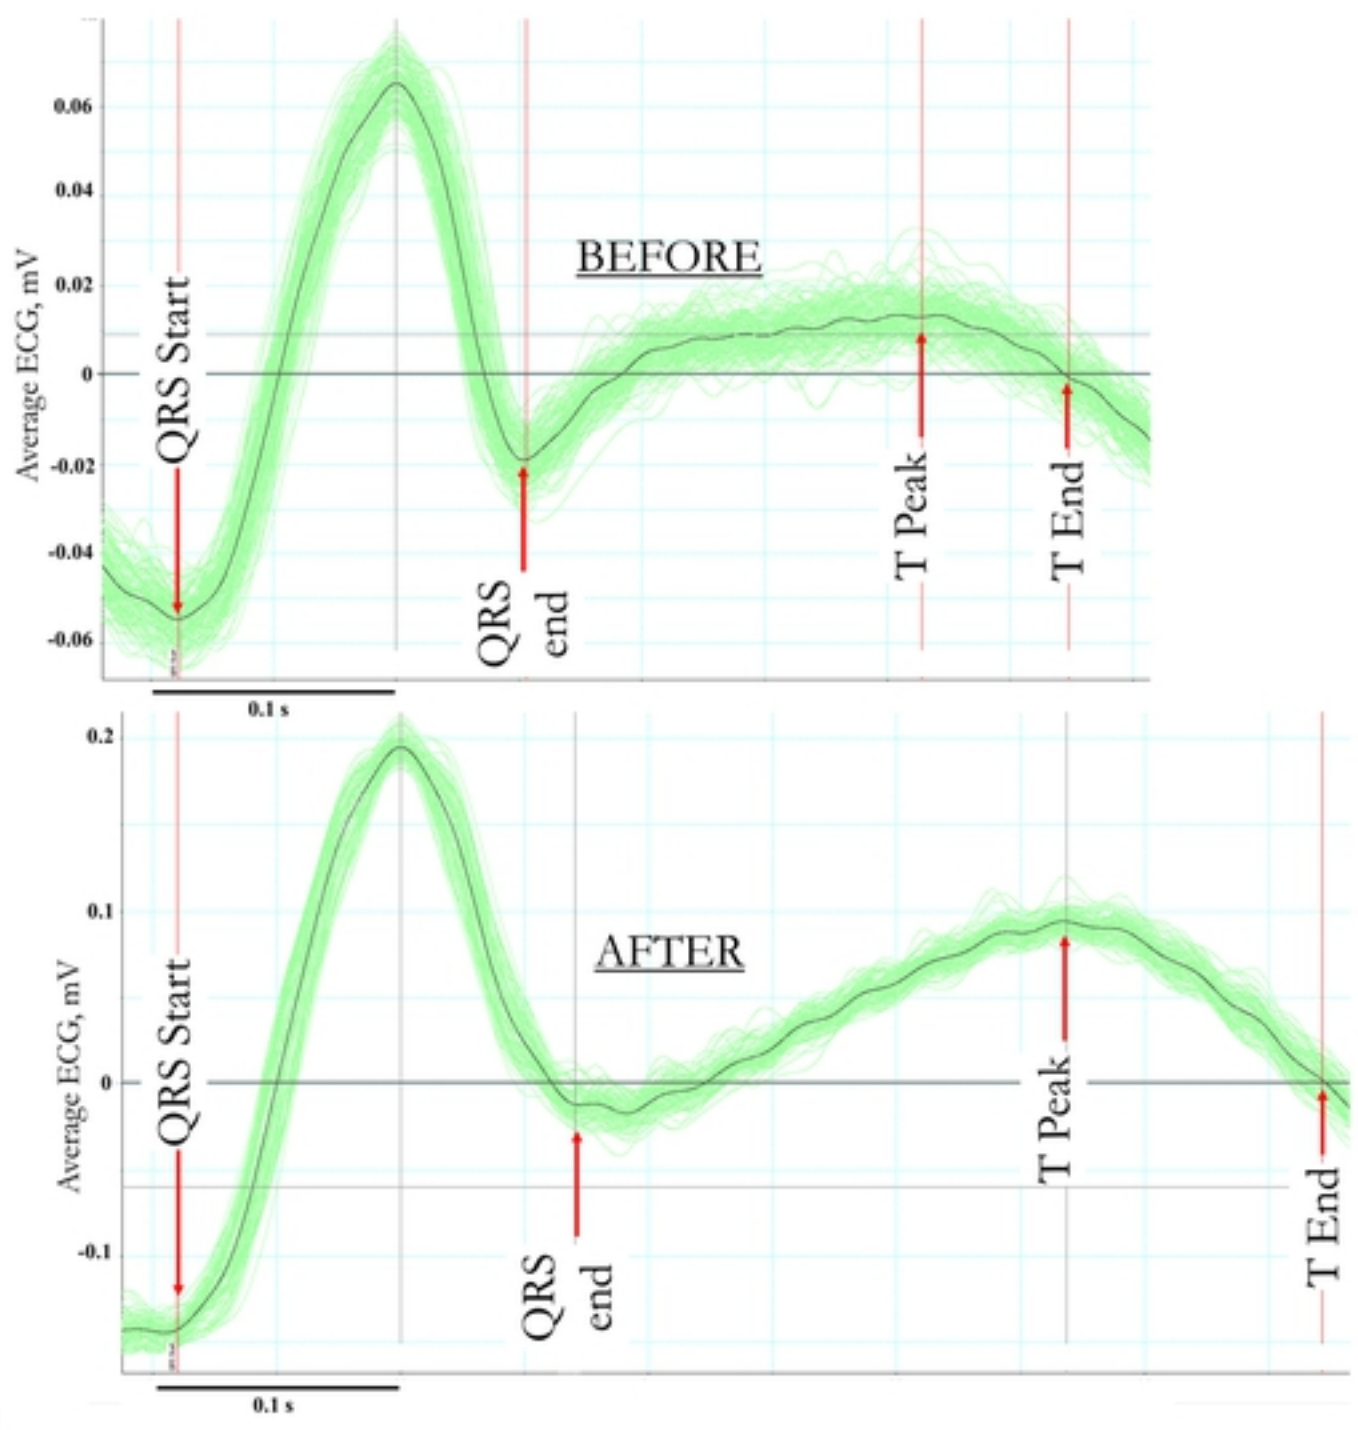

C)

Figure 4

Normalised Average ECG

BEFORE

bioRxiv preprint doi: <https://doi.org/10.1101/2021.02.08.430220>; this version posted February 8, 2021. The copyright holder for this preprint (which was not certified by peer review) is the author/funder, who has granted bioRxiv a license to display the preprint in perpetuity. It is made available under aCC-BY 4.0 International license.

QRS  
Start

T Peak

T End

Normalised Average ECG

AFTER

QRS  
Start

0.1 s

T Peak

T End

Figure 5

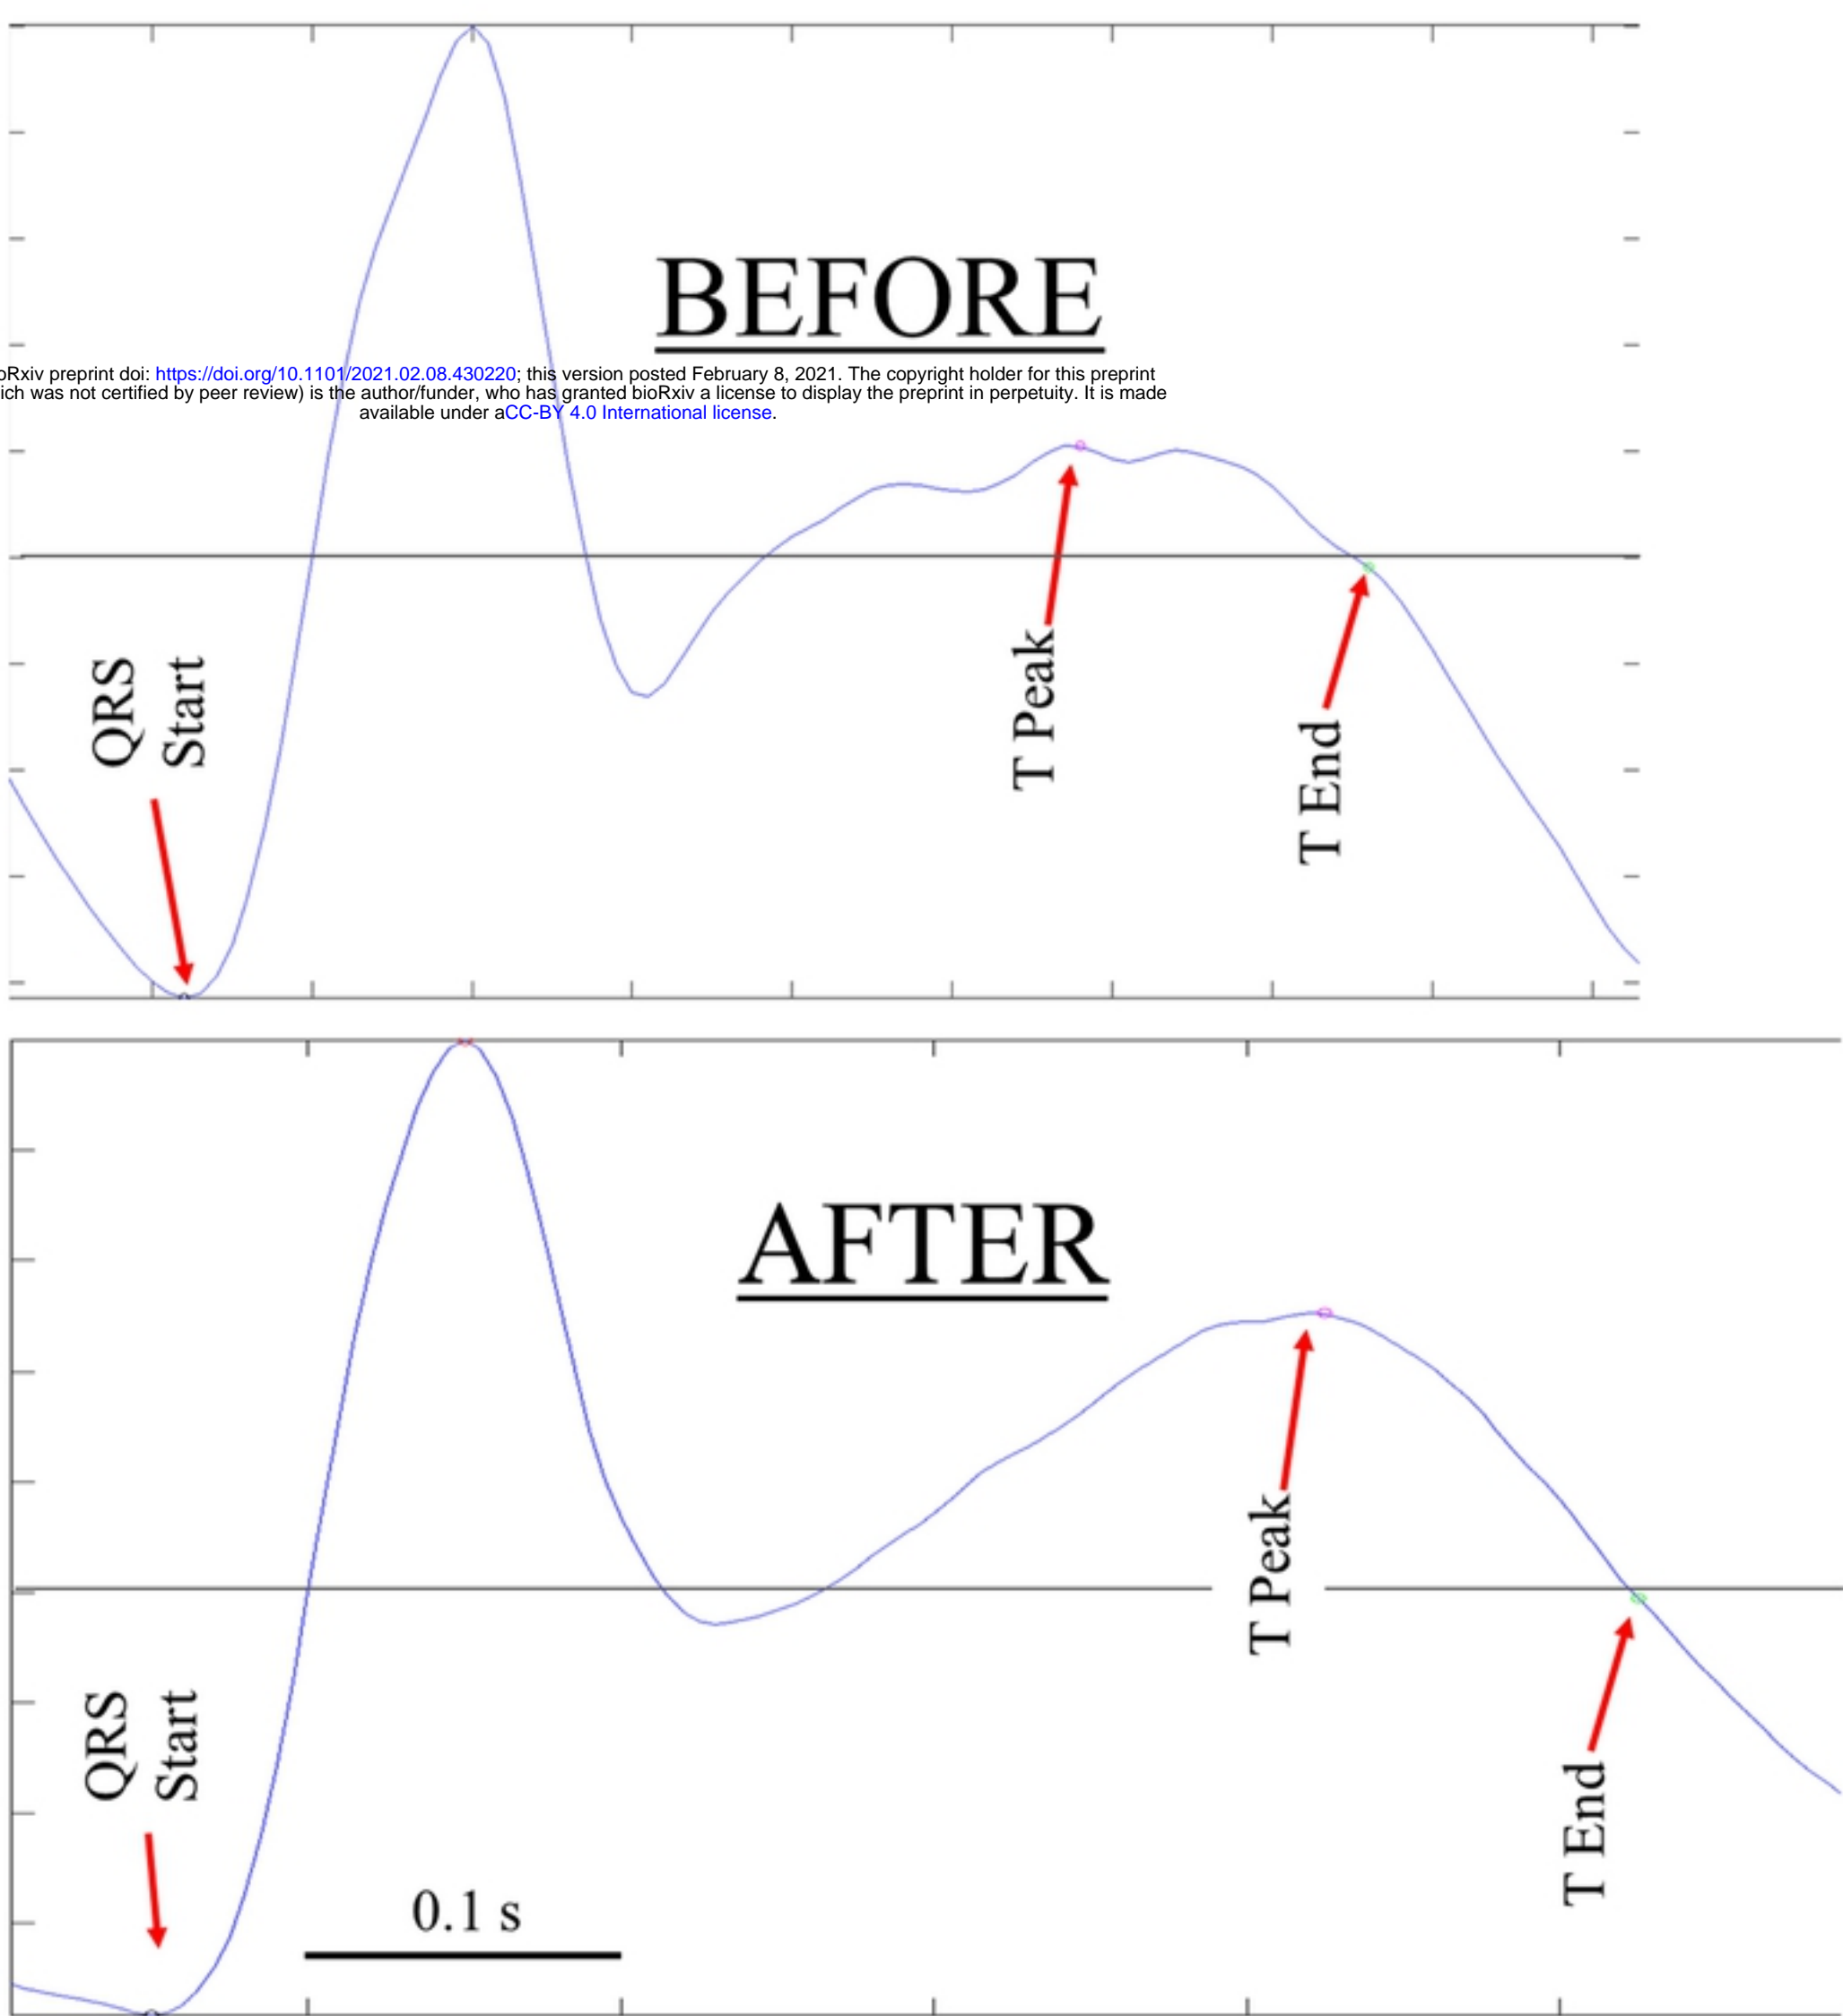

# Measured QTc and RR Interval for each section of ECG analysed with P-T Matlab software

bioRxiv preprint doi: <https://doi.org/10.1101/2021.02.08.430220>; this version posted February 8, 2021. The copyright holder for this preprint (which was not certified by peer review) is the author/funder, who has granted bioRxiv a license to display the preprint in perpetuity. It is made available under aCC-BY 4.0 International license.

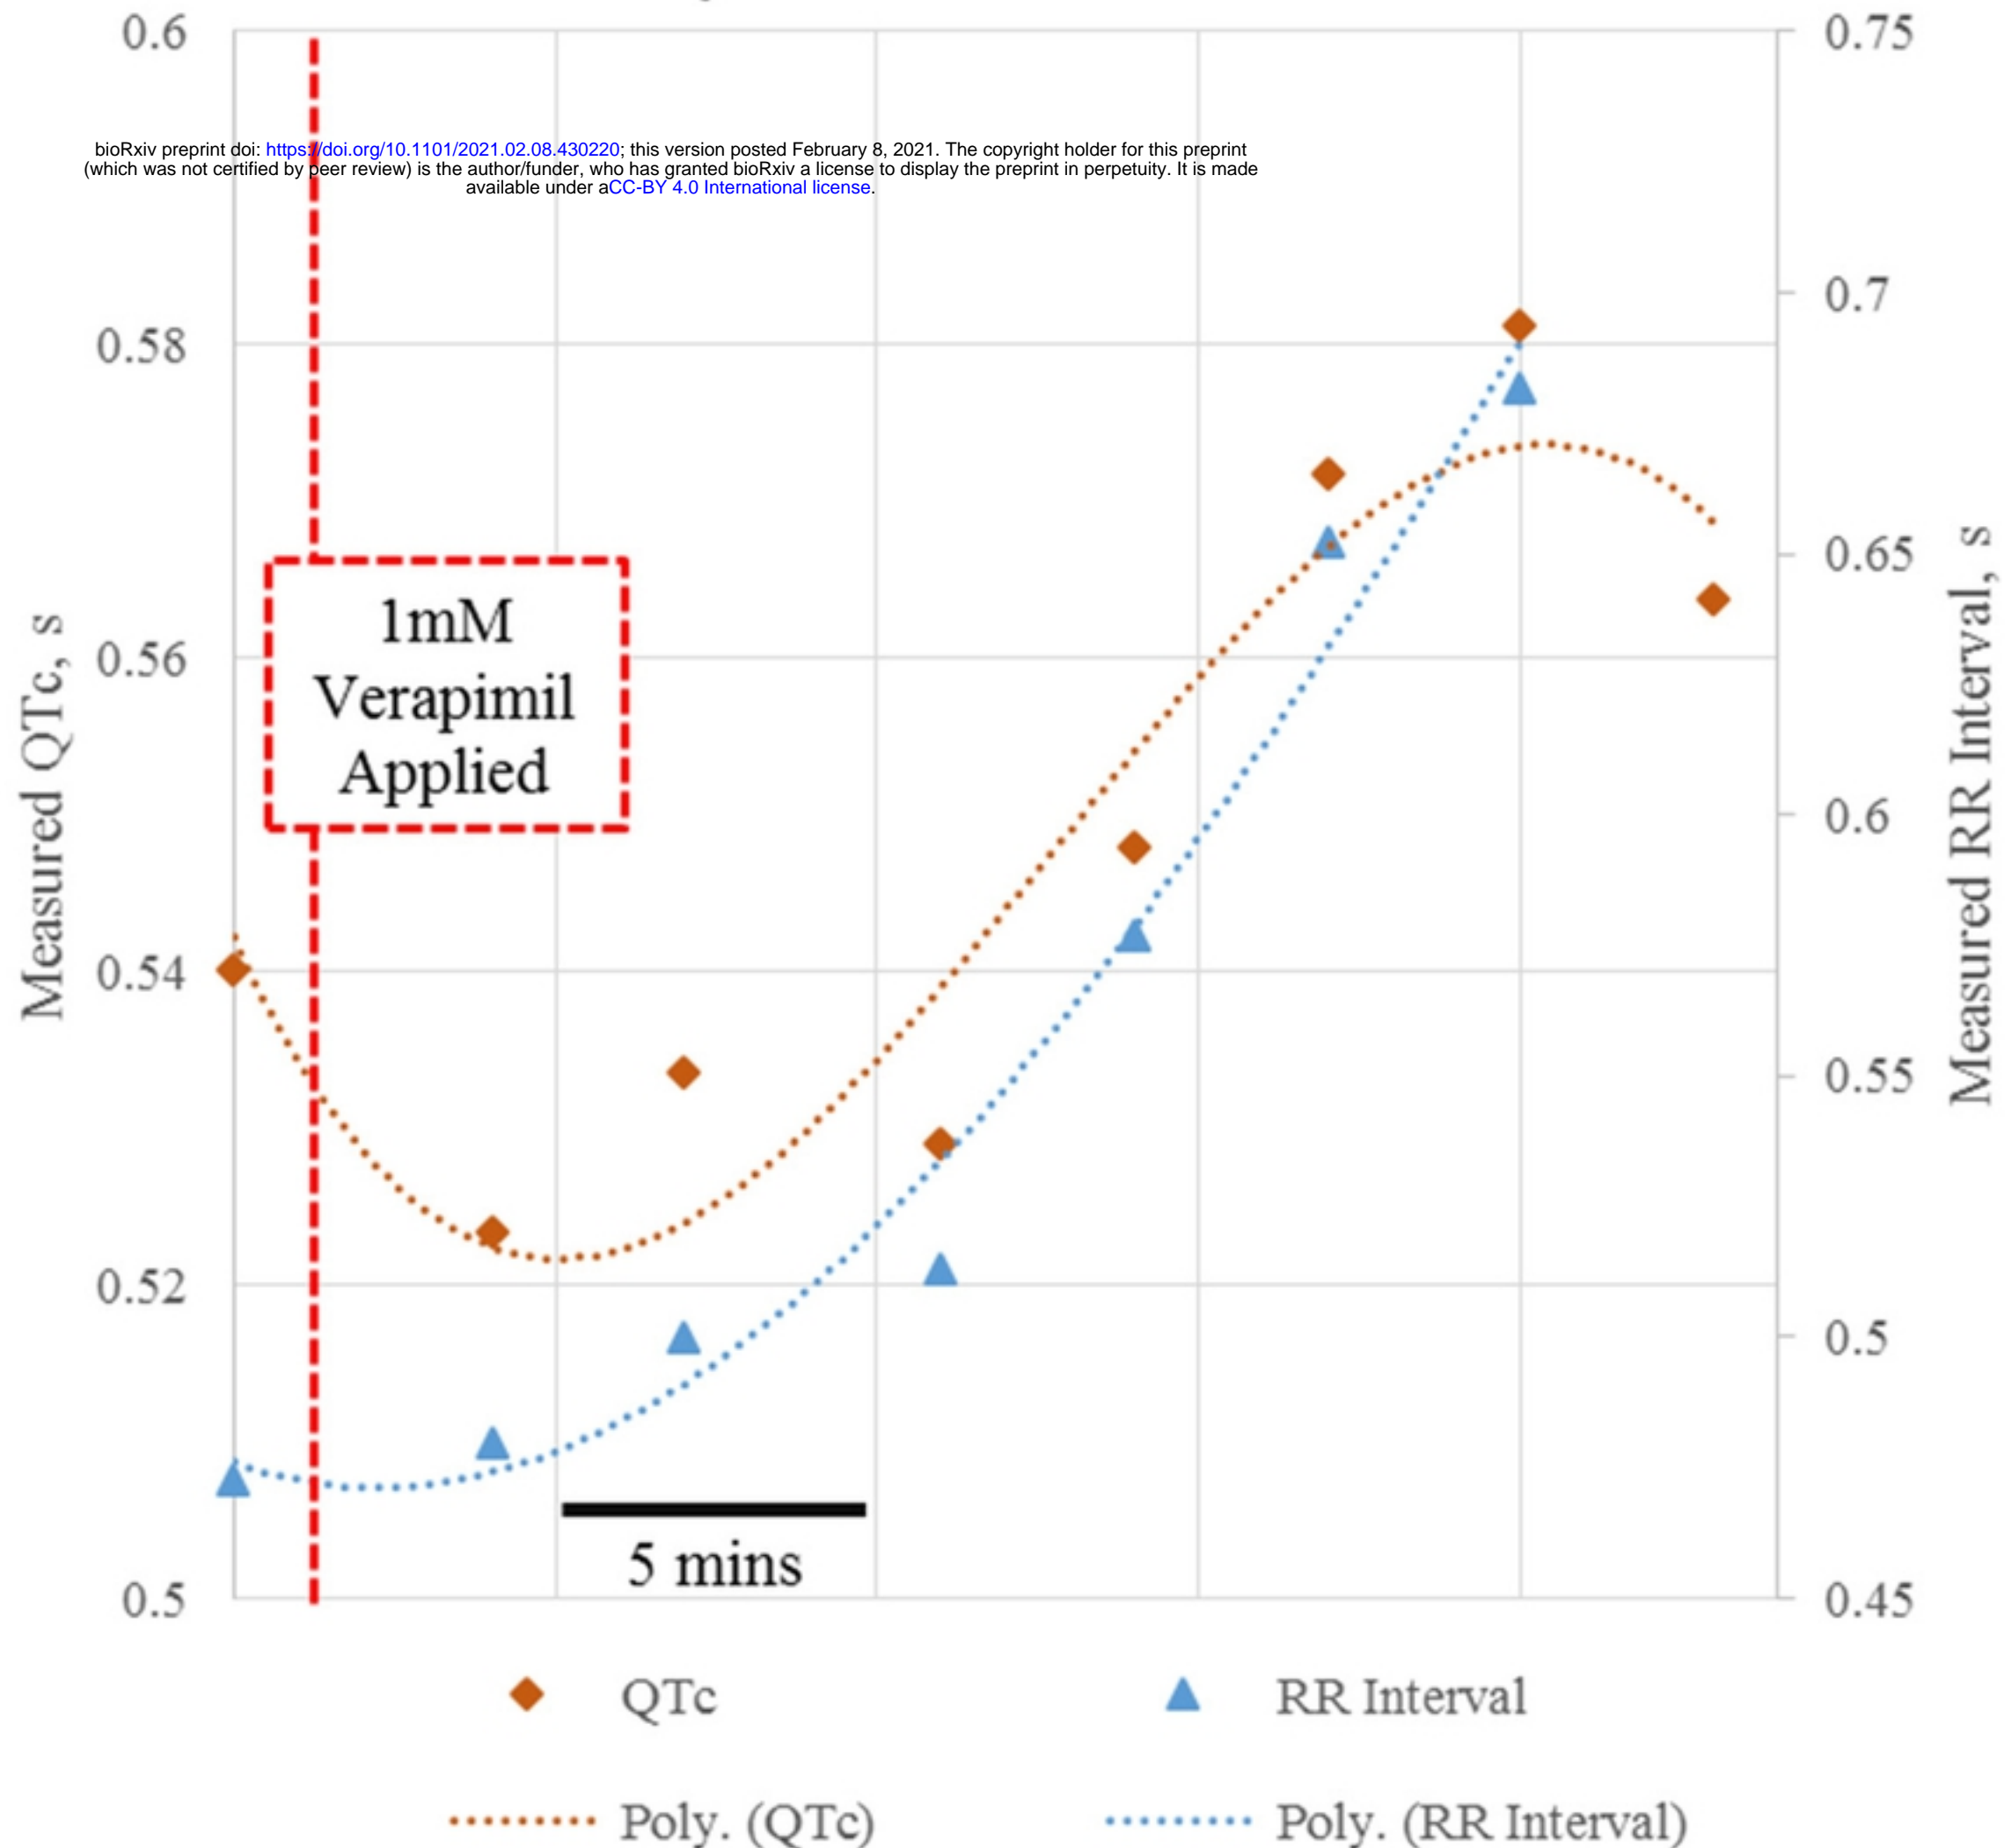

Figure 6

# Measured QTc and RR Interval for each section of ECG analysed with Labchart software

bioRxiv preprint doi: <https://doi.org/10.1101/2021.02.08.430220>; this version posted February 8, 2021. The copyright holder for this preprint (which was not certified by peer review) is the author/funder, who has granted bioRxiv a license to display the preprint in perpetuity. It is made available under aCC-BY 4.0 International license.

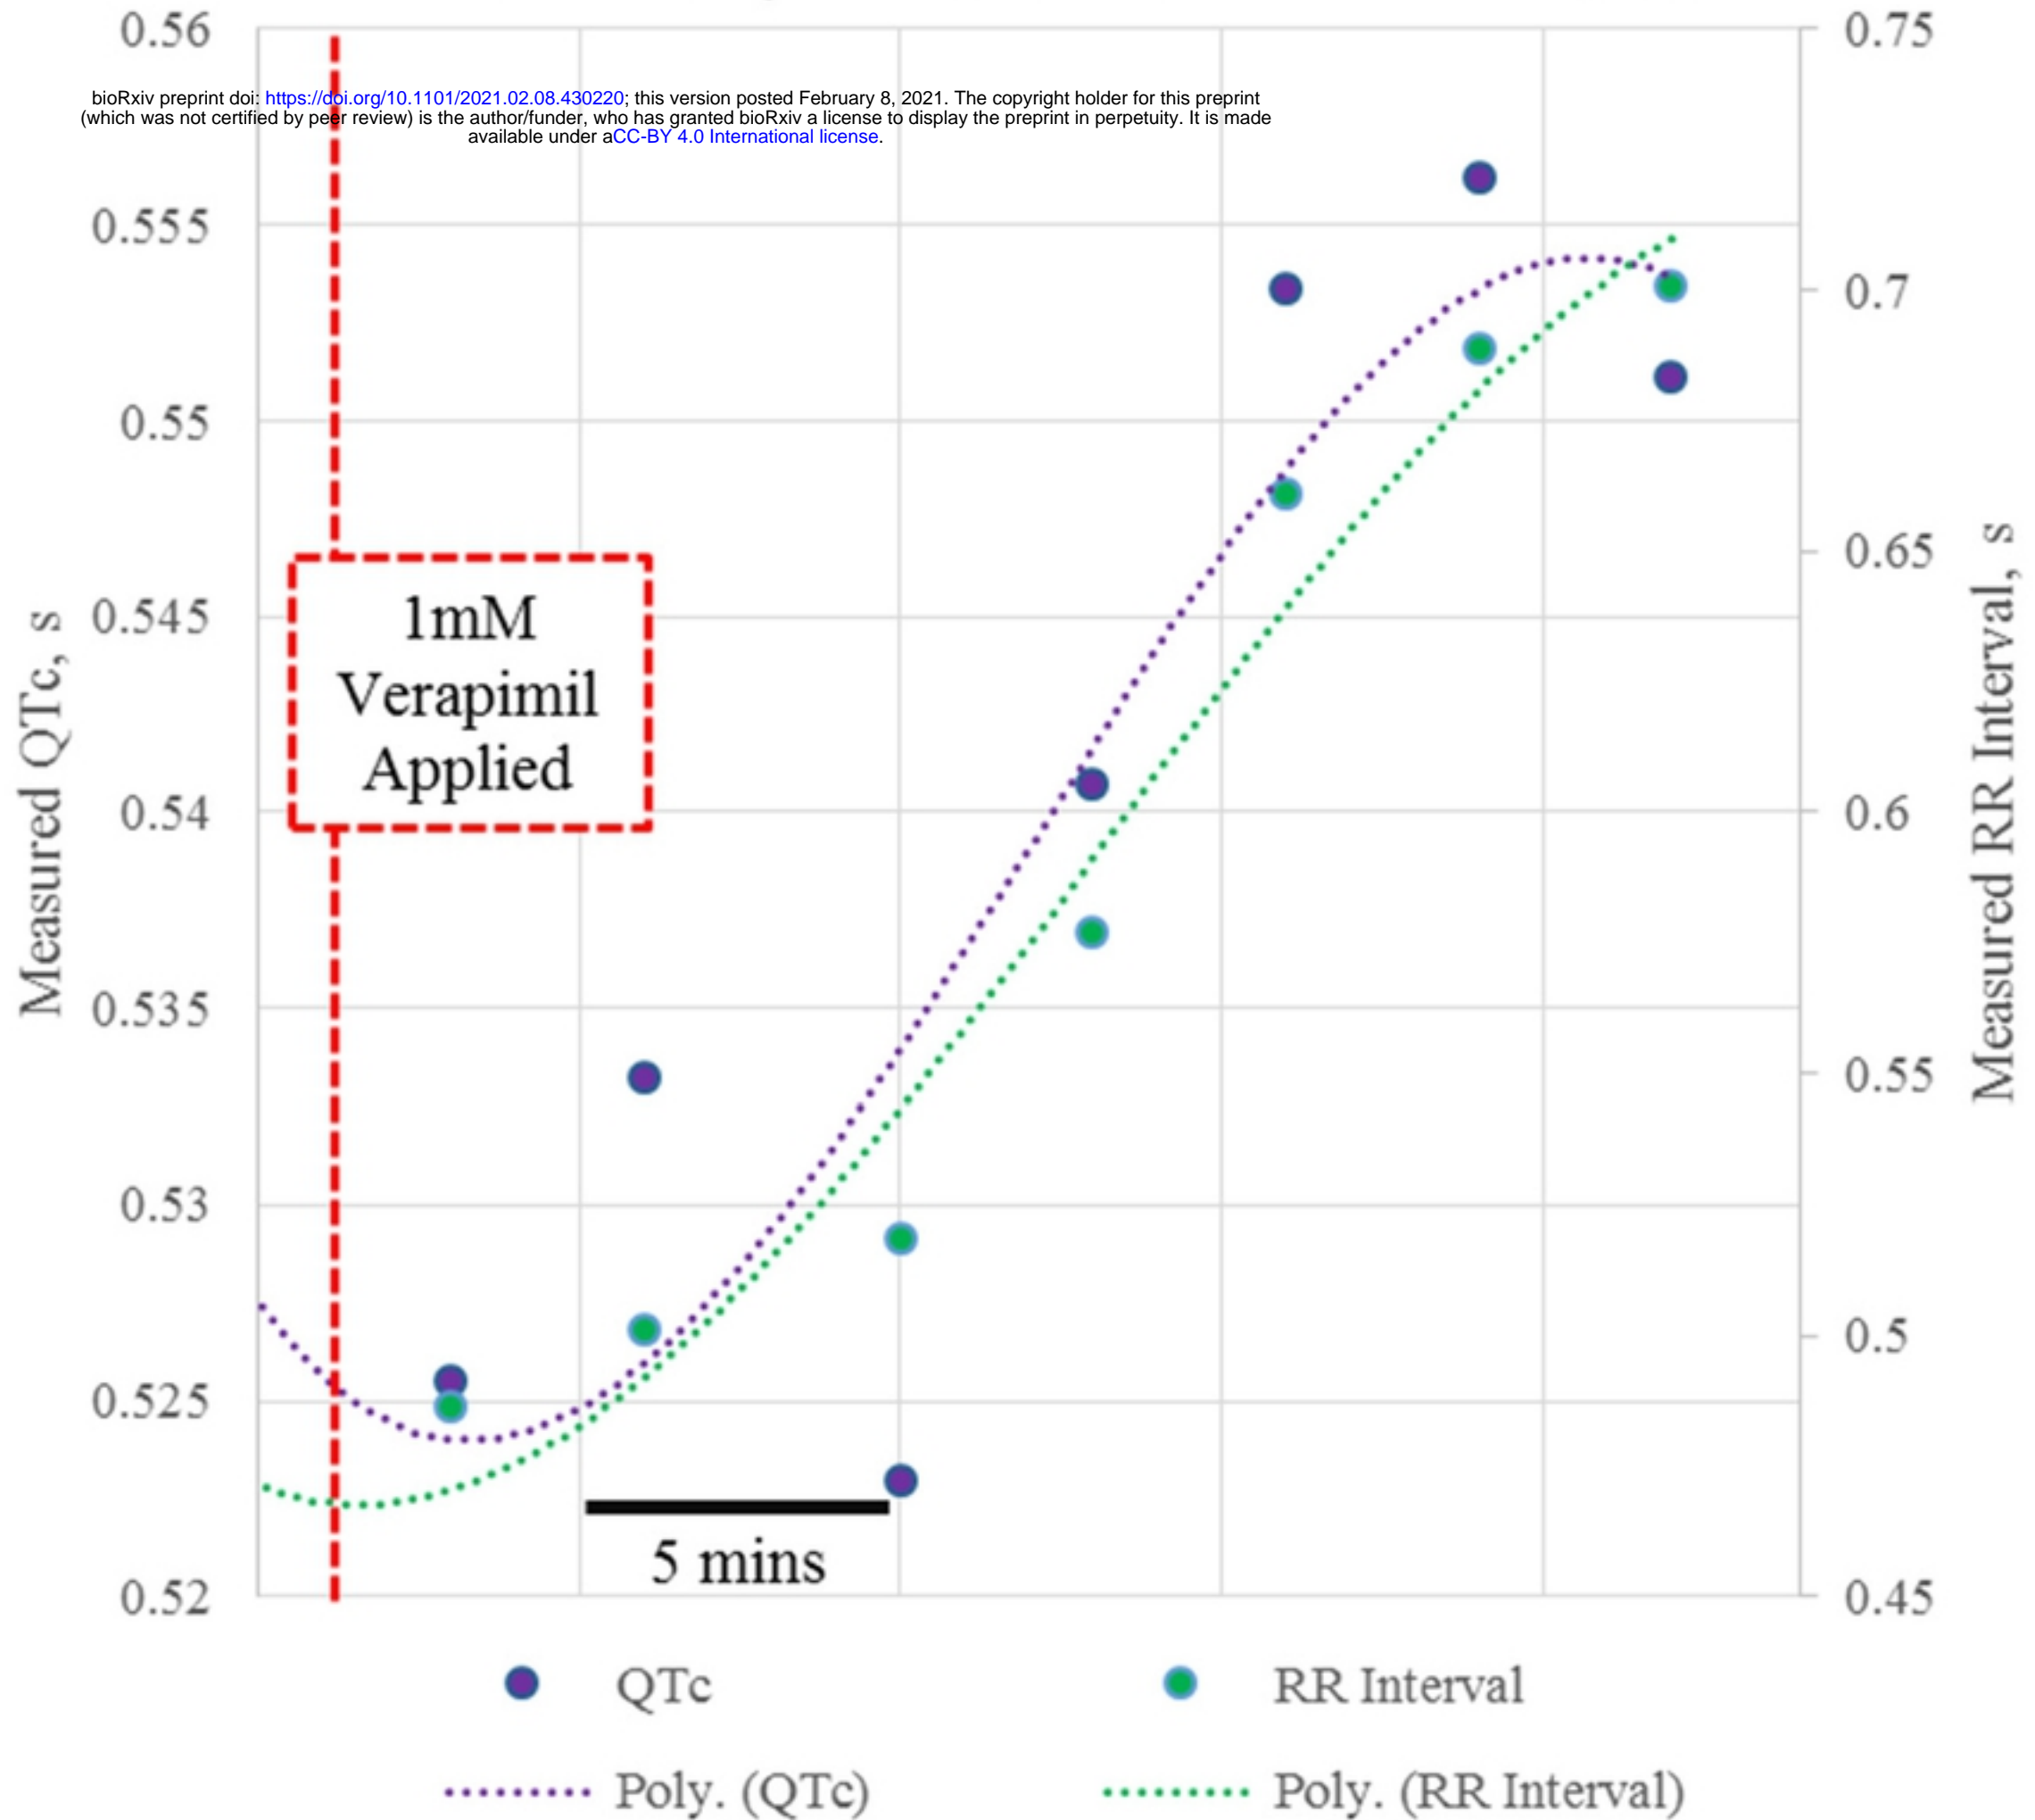

Figure 7



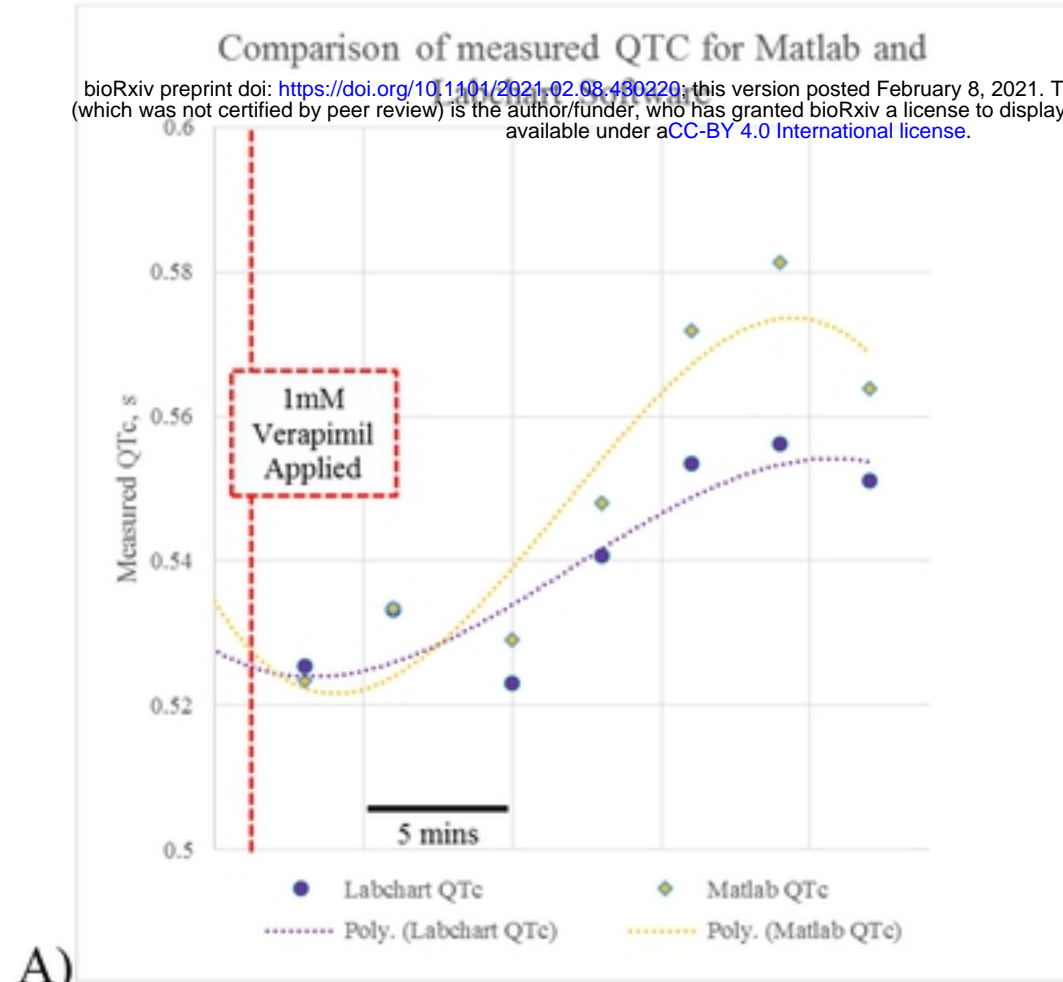

A)

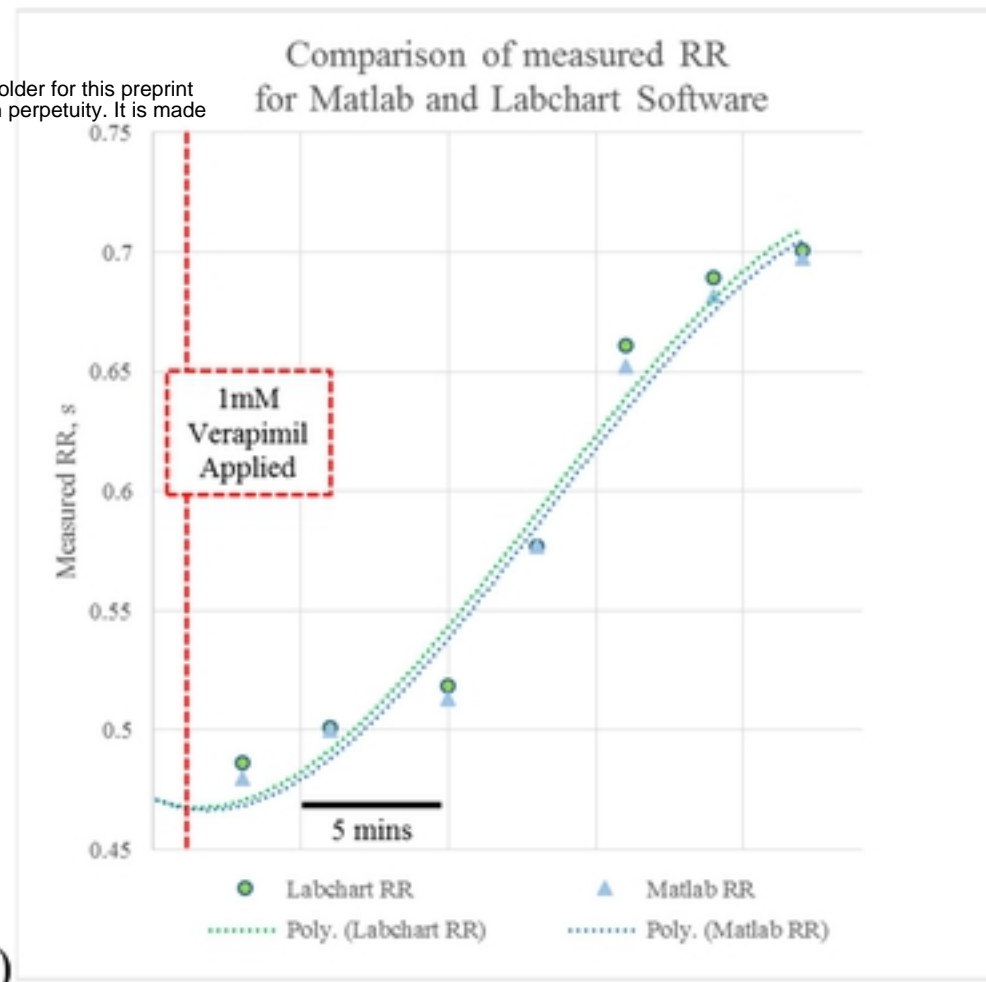

B)

### Comparison of Number of Detected Beats for LabChart and Matlab

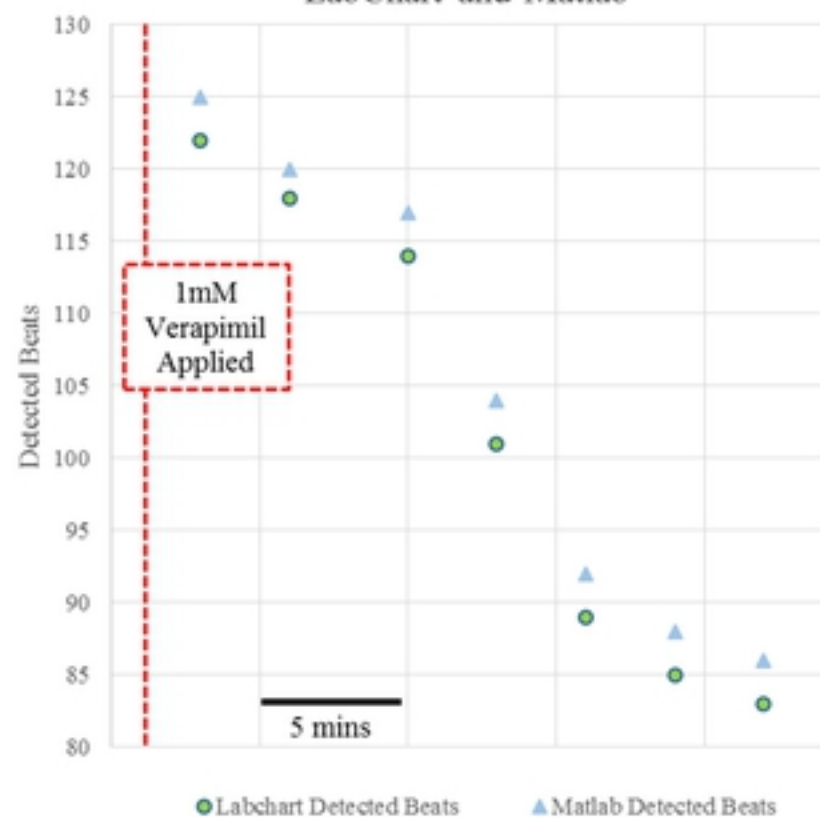

C)

### Comparison of Percentage change QTc for LabChart and Matlab

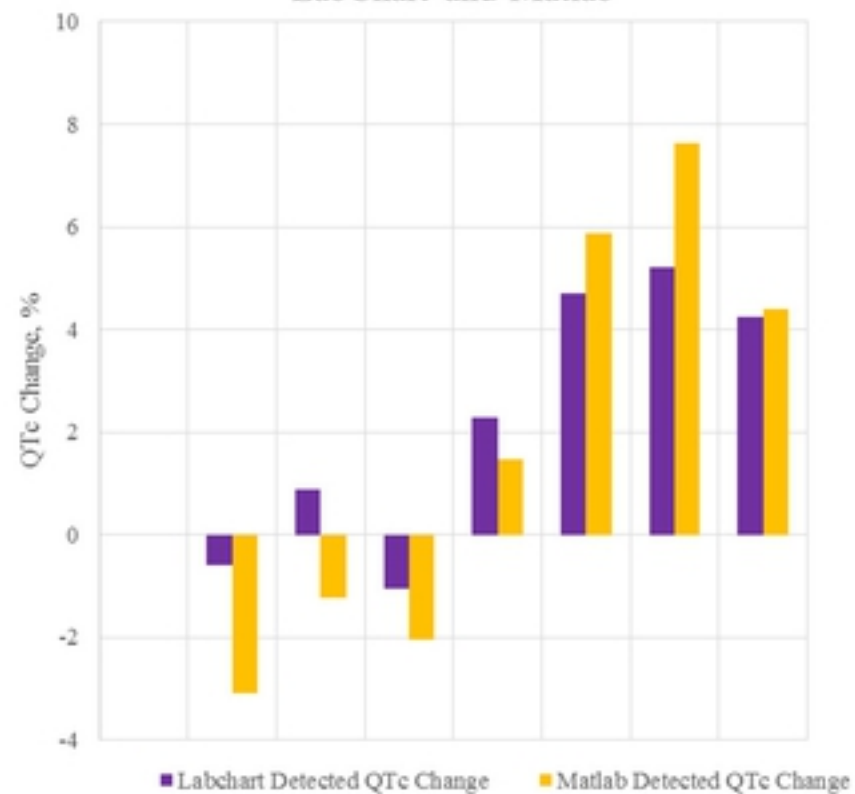

D)
